# Supplementary material for: Unravelling the catalytic potential of a magnetic CoFe2O4/Cu–ABDC MOF composite in the sustainable synthesis of 2H-indazole motifs
Source: Royal Society of Chemistry journal article supplement (doi:10.1039/d2nj01490d), 2022-01-01

## Supplementary Information

### **Unravelling the catalytic potential of a magnetic CoFe<sub>2</sub>O<sub>4</sub>/Cu-ABDC MOF composite in the sustainable synthesis of 2*H*-Indazole motifs**

*Sneha Yadav, Ranjana Dixit, Shivani Sharma, Sriparna Dutta, Bhavya Arora, Pooja Rana,*

*Bhawna Kaushik, Kanika Solanki and Rakesh K. Sharma\**

*Green Chemistry Network Centre, Department of Chemistry, University of Delhi, New Delhi-110007,*

*India. Fax: +91-011-27666250; Tel: 011-276666250 Email: [rksharmagreenchem@hotmail.com](mailto:rksharmagreenchem@hotmail.com)*

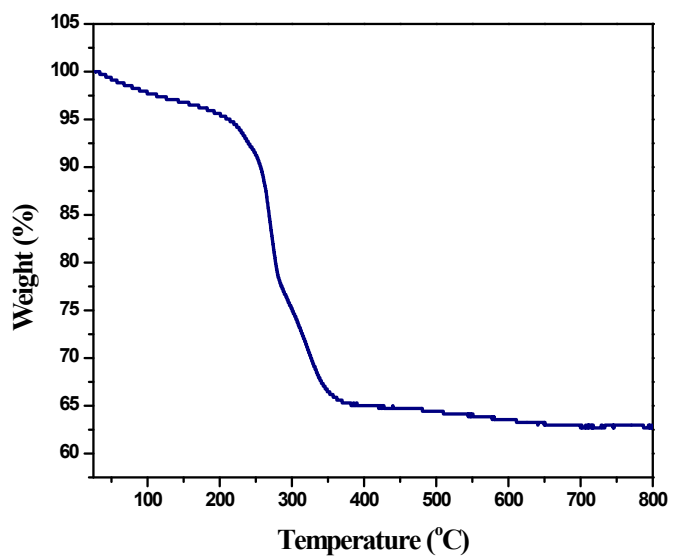

**Fig. S1** Thermogravimetric analysis curve of CoFe<sub>2</sub>O<sub>4</sub>/Cu-ABDC.

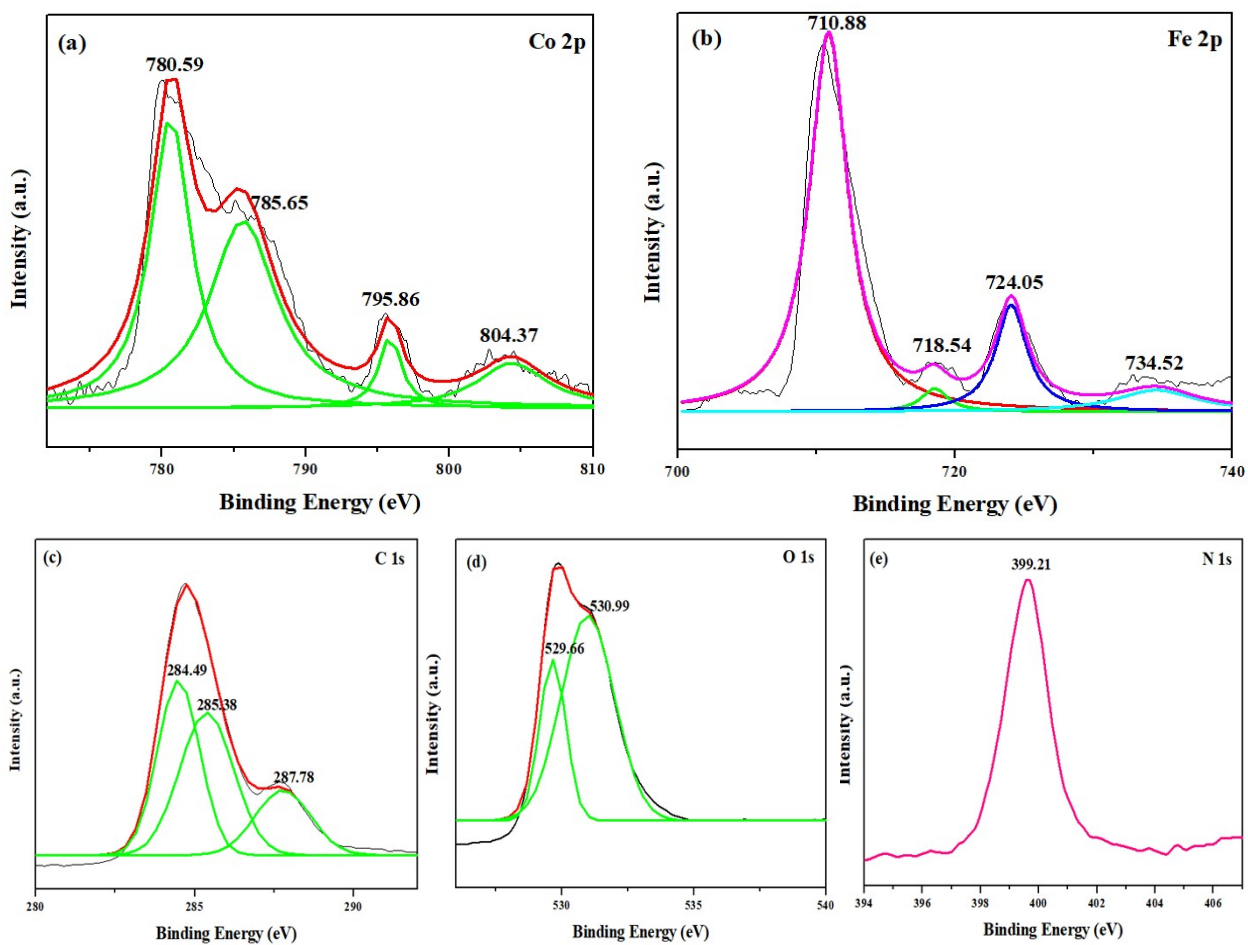

**Fig. S2** Core level XPS spectrum of (a) Co, (b) Fe, (c) C, (d) O and (e) N in CoFe<sub>2</sub>O<sub>4</sub>/Cu-ABDC.

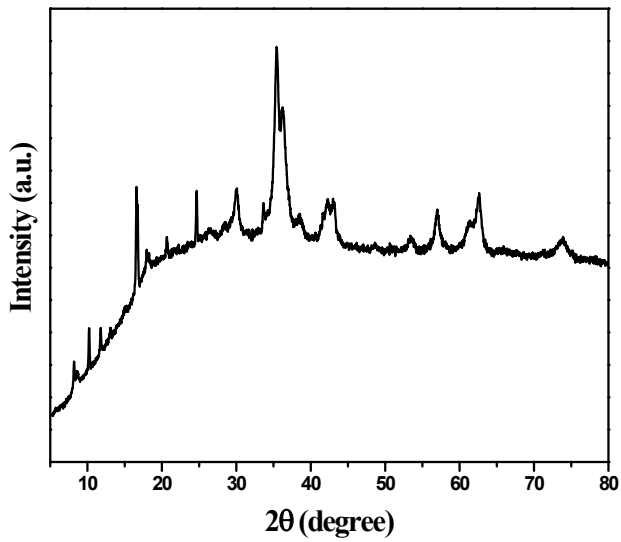

Fig. S3. XRD spectrum of recovered  $\text{CoFe}_2\text{O}_4/\text{Cu-ABDC}$ .

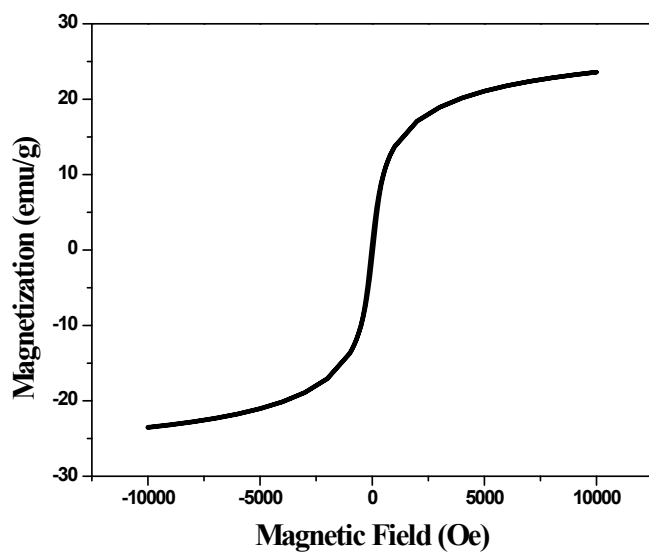

Fig. S4 VSM curve of recovered  $\text{CoFe}_2\text{O}_4/\text{Cu-ABDC}$ .

**Table S1.** Comparison of catalytic activity of CoFe<sub>2</sub>O<sub>4</sub>/Cu-ABDC with other metal based catalyst reported in literature for the one-pot multicomponent coupling between 2-bromobenzaldehyde, aniline and sodium azide.

| S. No. | 2-bromo benzaldehydes                                                               | 1° aromatic amines                                                                  | Catalytic conditions                                                                                      | Yield (%) | Ref.         |
|--------|-------------------------------------------------------------------------------------|-------------------------------------------------------------------------------------|-----------------------------------------------------------------------------------------------------------|-----------|--------------|
| 1.     | 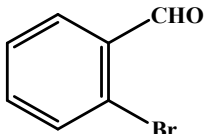   |    | CuI/TMEDA, NaN <sub>3</sub> , DMSO, 120 °C, 12 h                                                          | 98        | 51           |
| 2.     |    |    | Cu <sup>II</sup> -hydrotalcite, NaN <sub>3</sub> , DMSO, 120 °C, 6 h                                      | 91        | 52           |
| 3.     |    |    | CuO Nps, NaN <sub>3</sub> , Cs <sub>2</sub> CO <sub>3</sub> , DMSO, 120 °C, 5 h                           | 84        | 53           |
| 4.     |   |   | Cu <sub>2</sub> O nano rhombic dodecahedra, NaN <sub>3</sub> , 1,10-phenanthroline DMSO, 80 °C, 4 h       | 95        | 54           |
| 5.     |  |  | Cu <sub>2</sub> O Np, NaN <sub>3</sub> , PEG, 120 °C, 6 h                                                 | 90        | 55           |
| 6.     |  |  | Amine functionalized Silica/Starch composite-Cu(acac) <sub>2</sub> , NaN <sub>3</sub> , DMSO, 100 °C, 6 h | 85        | 56           |
| 7.     |  |  | Cu Np-Peptide nanofiber, NaN <sub>3</sub> , PEG, 130 °C, 3.5 h                                            | 88        | 57           |
| 8.     |  |  | CoFe <sub>2</sub> O <sub>4</sub> /Cu-ABDC, NaN <sub>3</sub> , Water, 100 °C, 8 h                          | 98        | Present work |

# GC-MS Spectra of all the products

## Entry 1

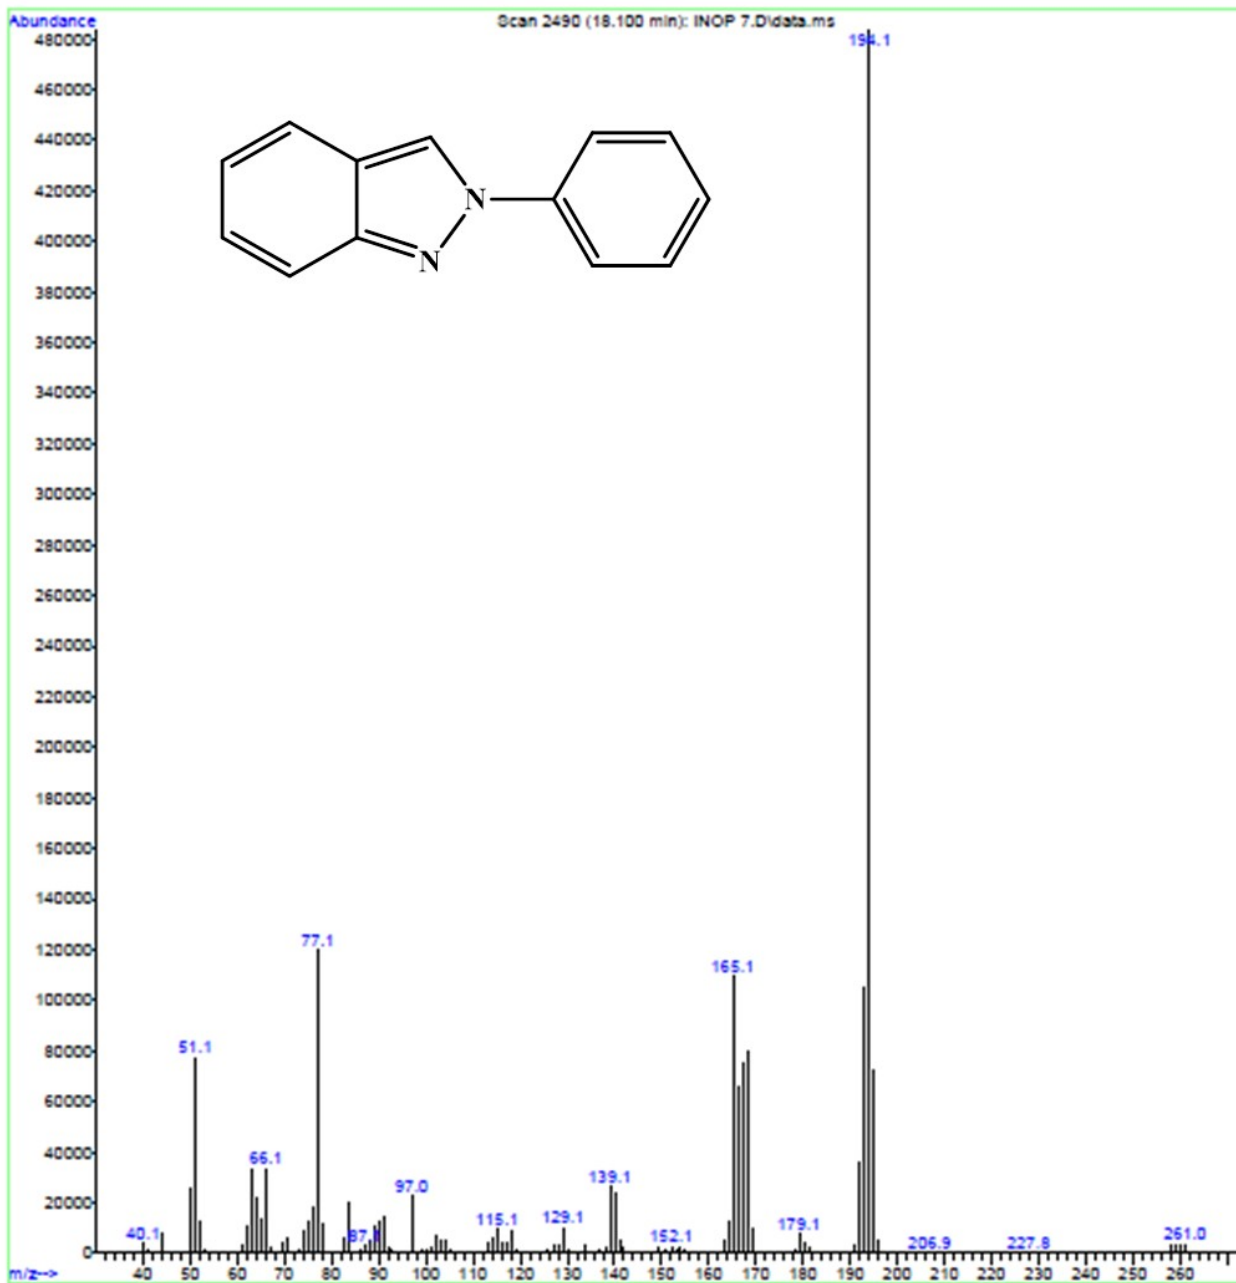

## Entry 2

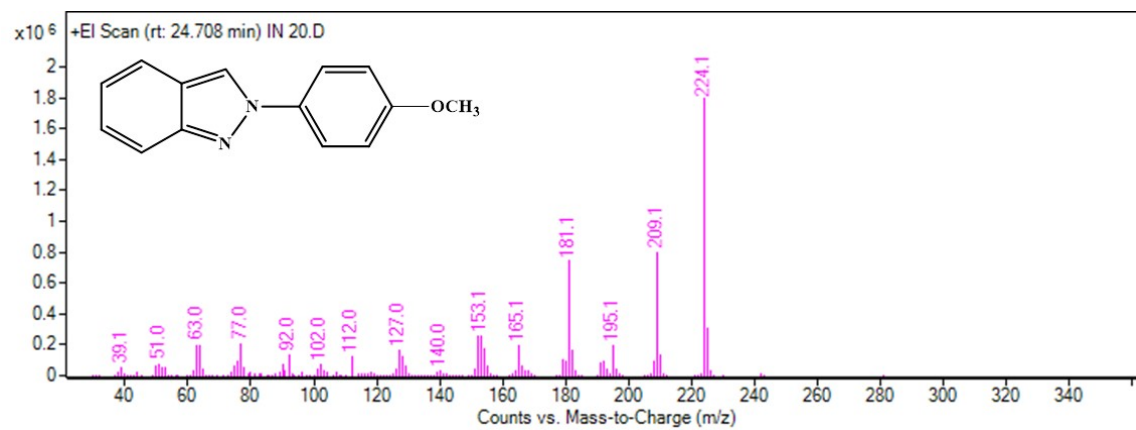

### Entry 3

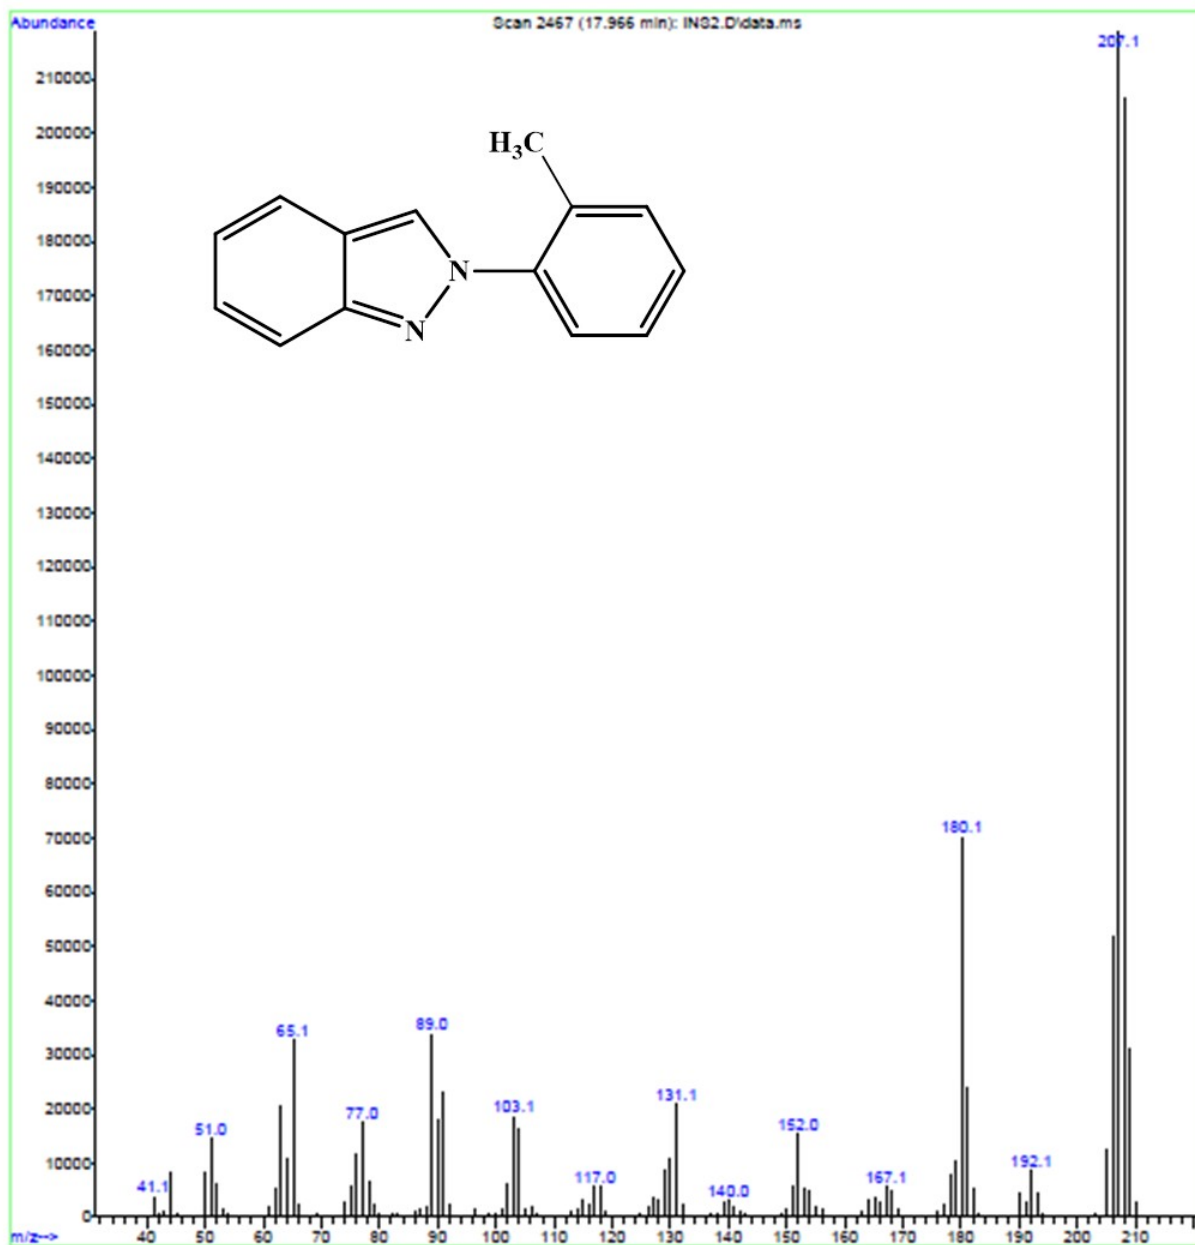



# Entry 4

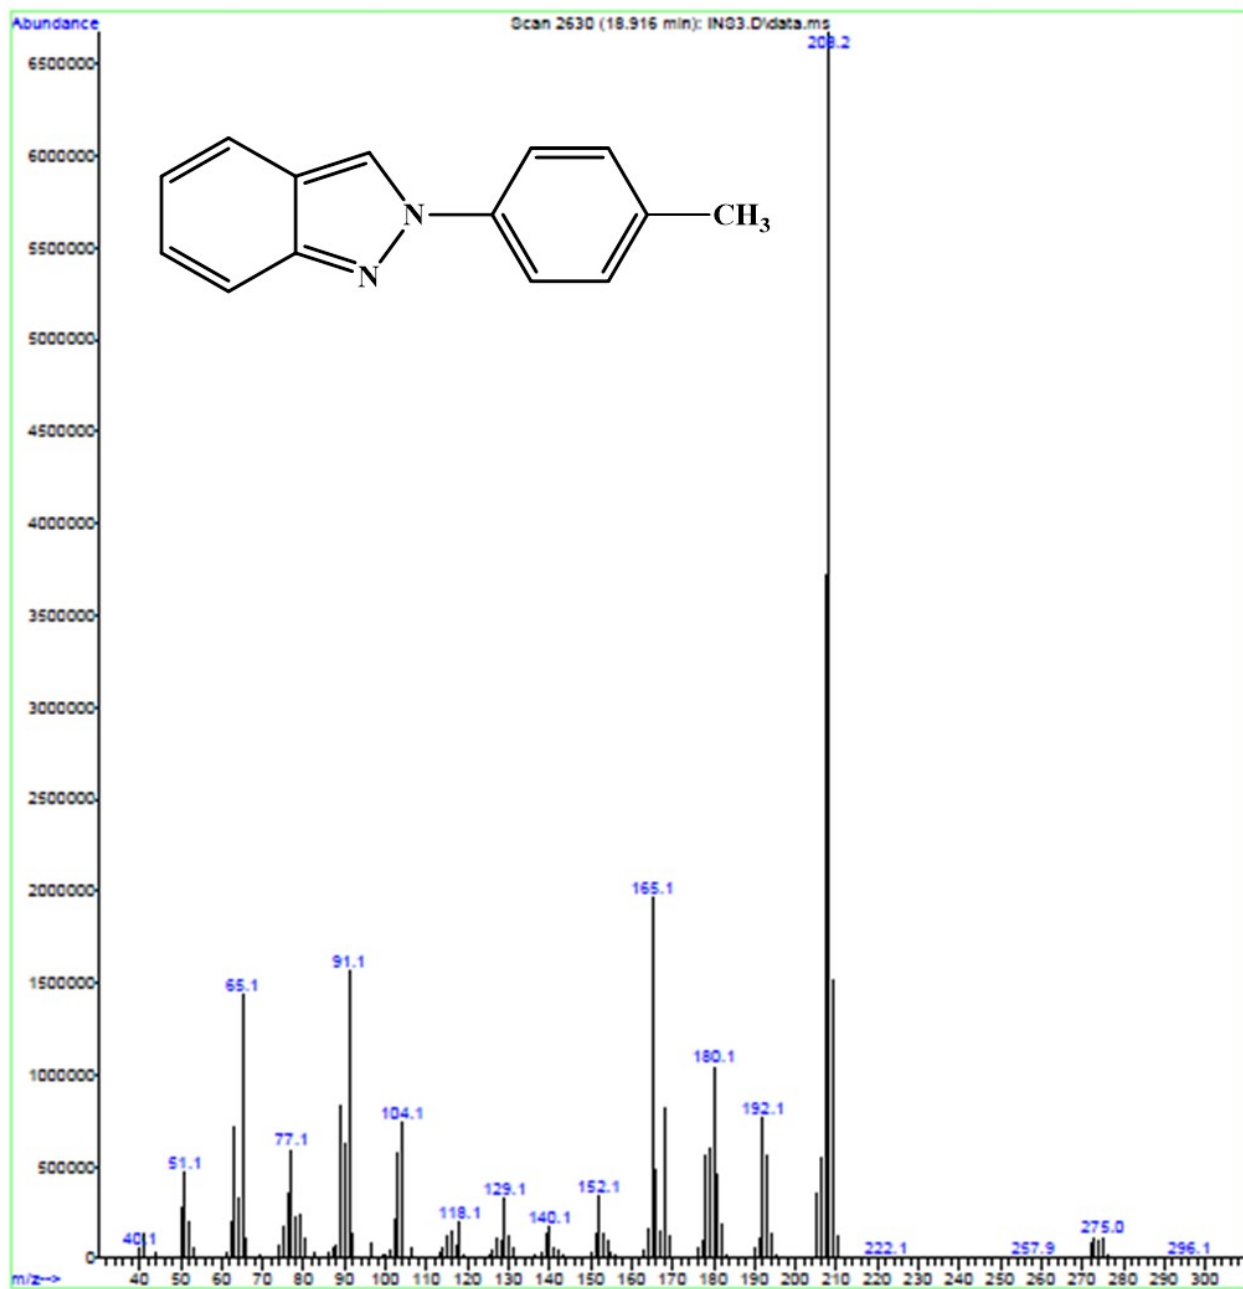

# Entry 5

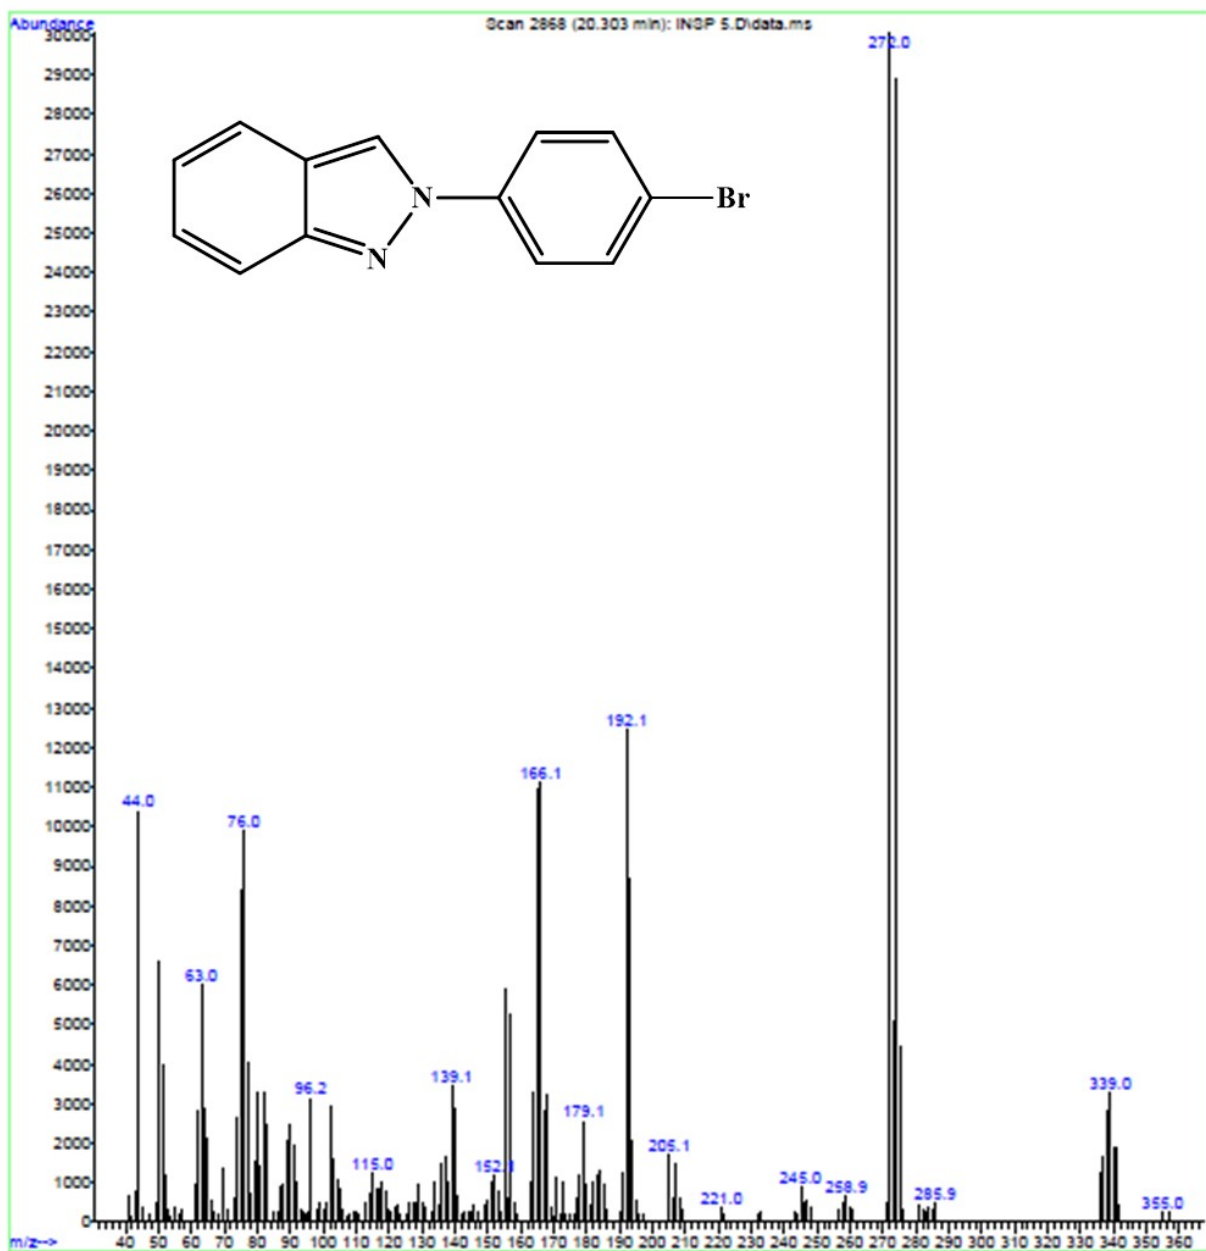

# Entry 6

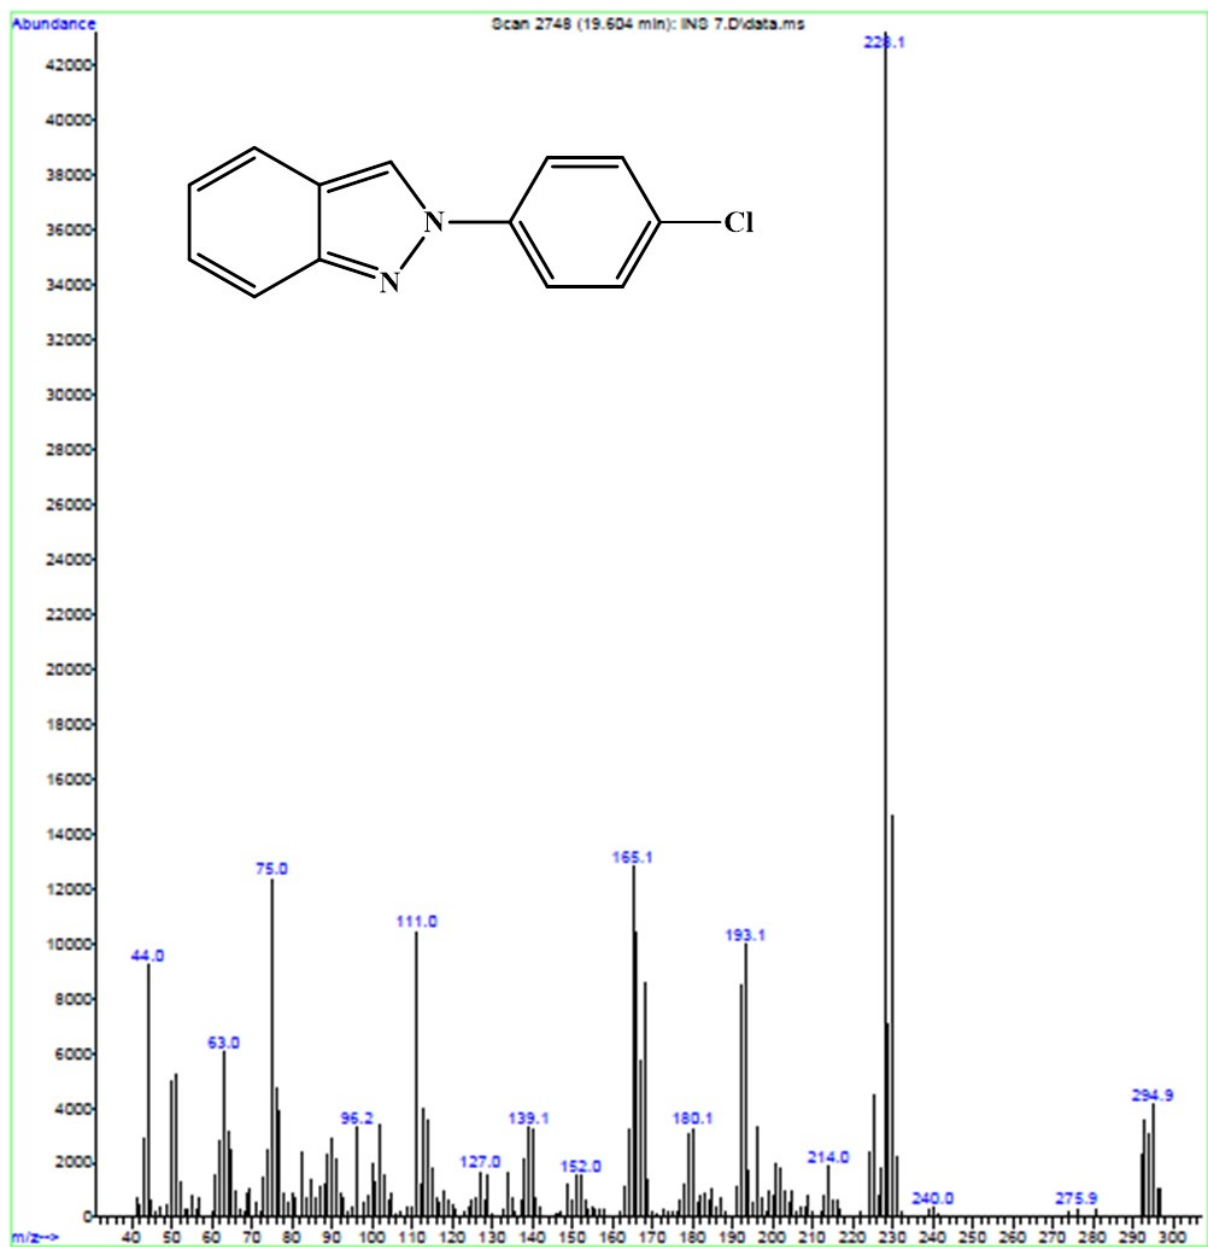

# Entry 7

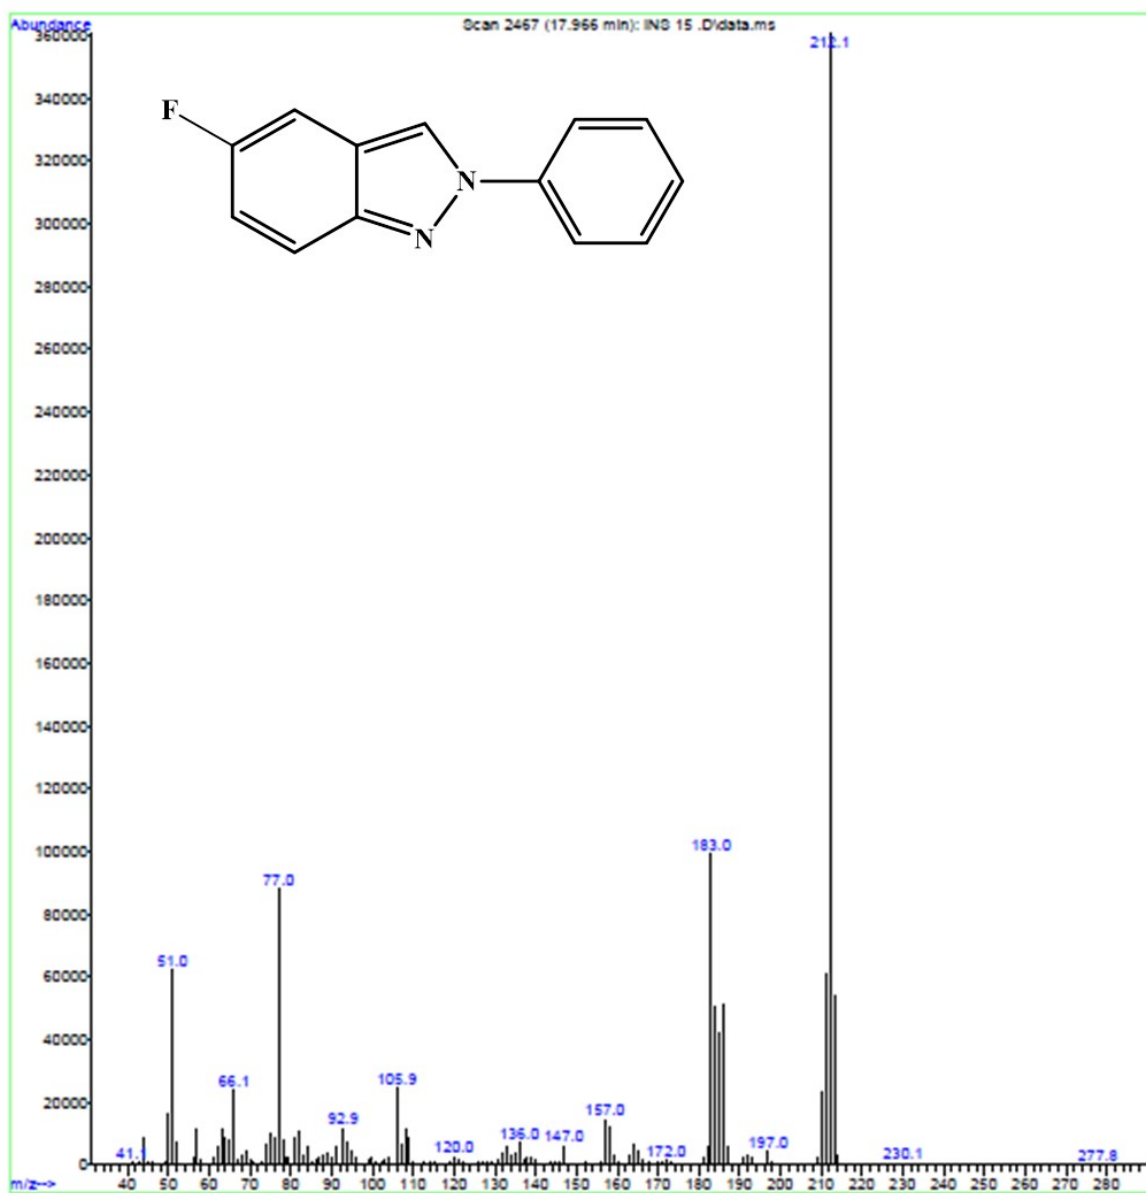

## Entry 8

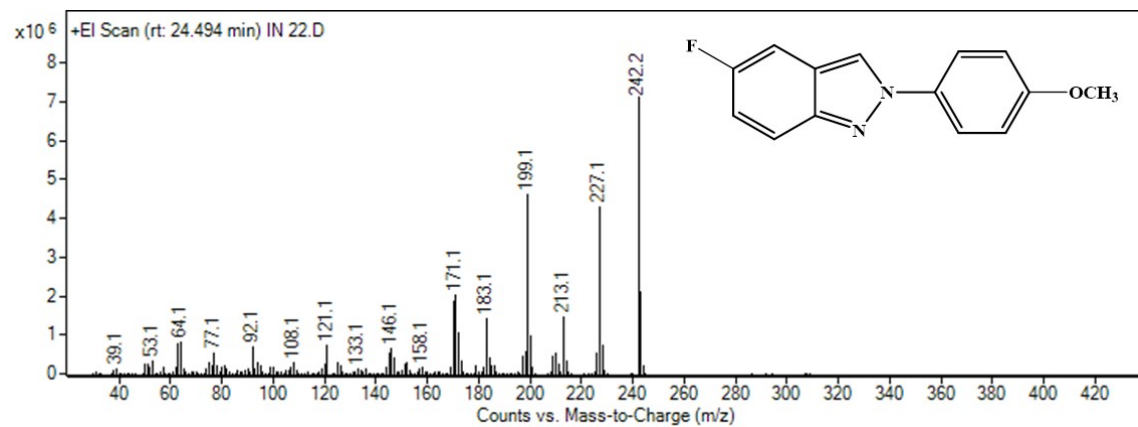

# Entry 9

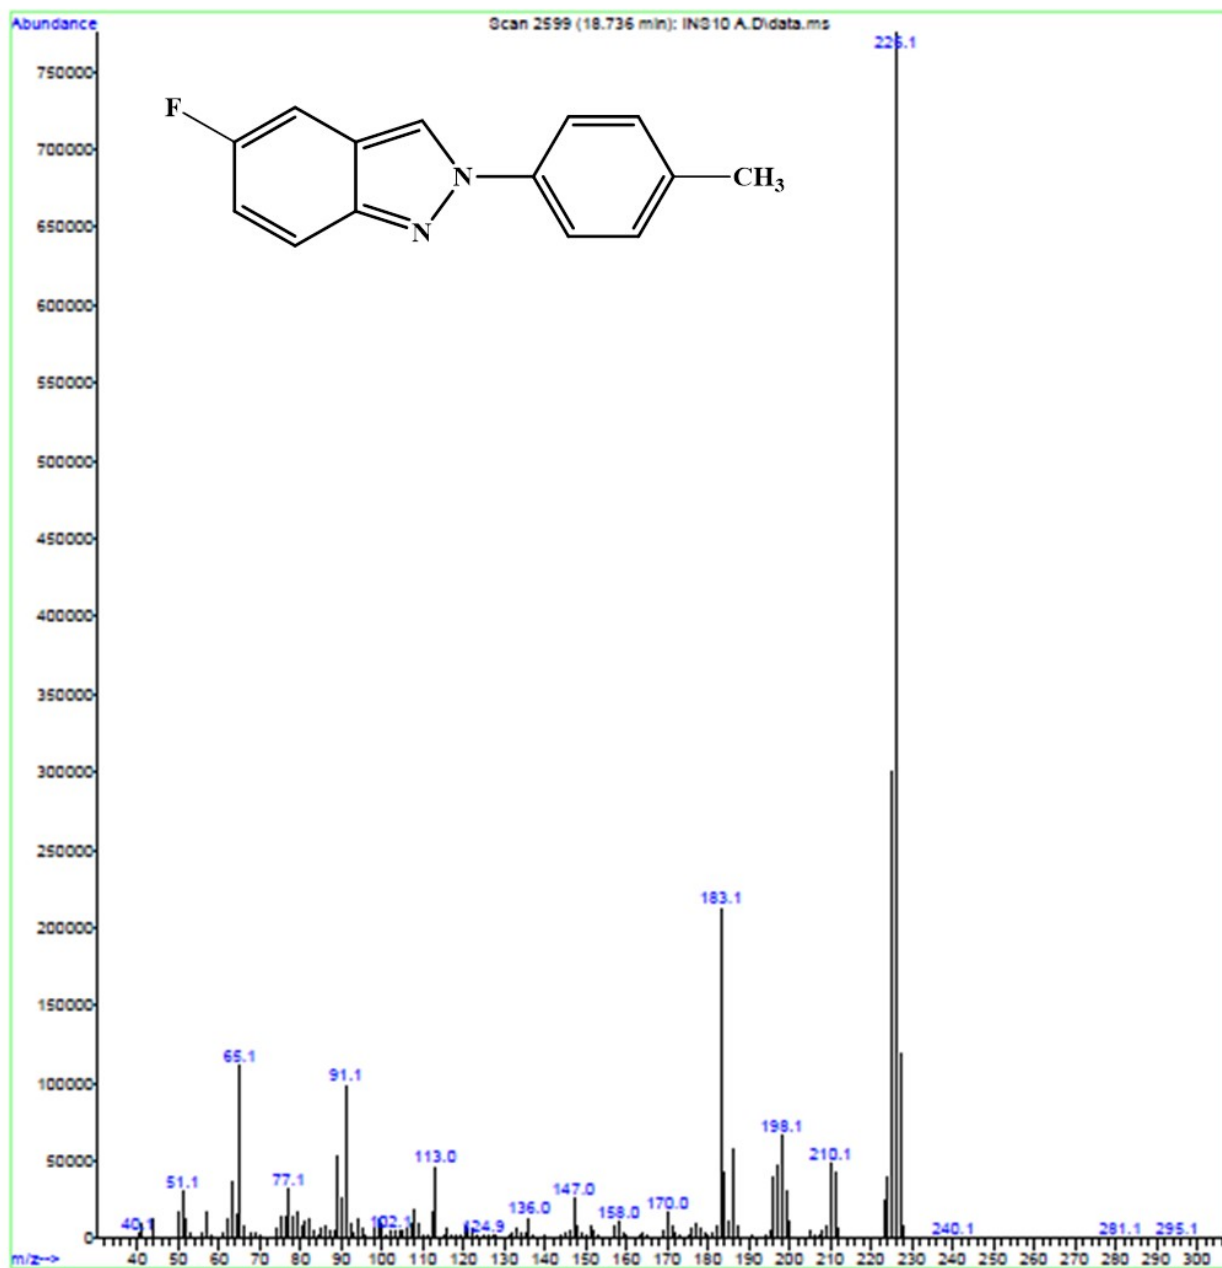

# Entry 10

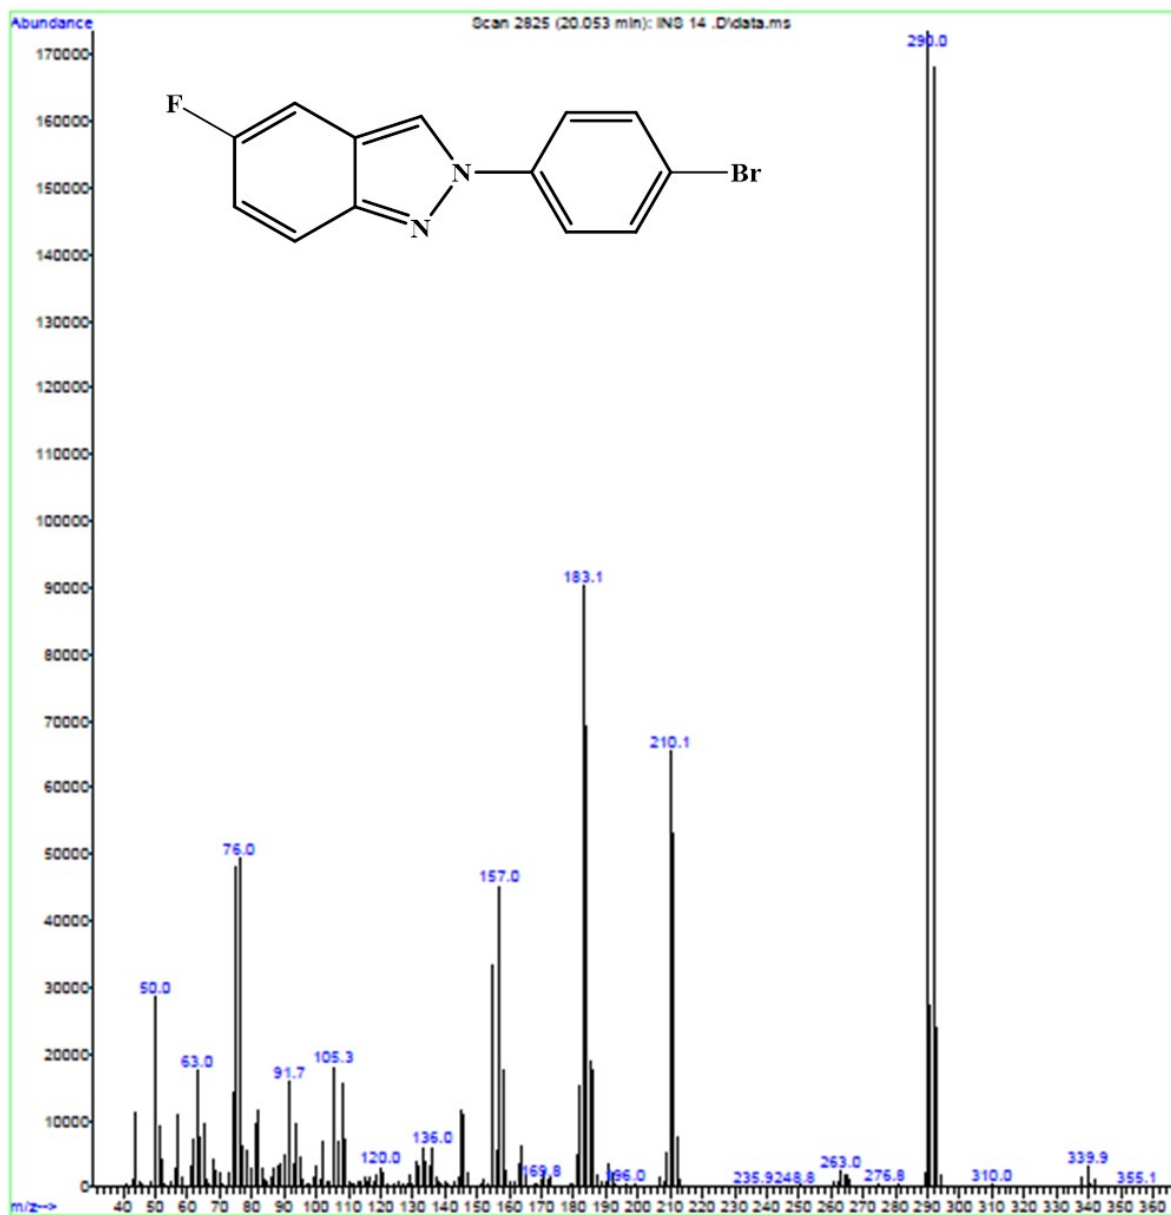

# Entry 11

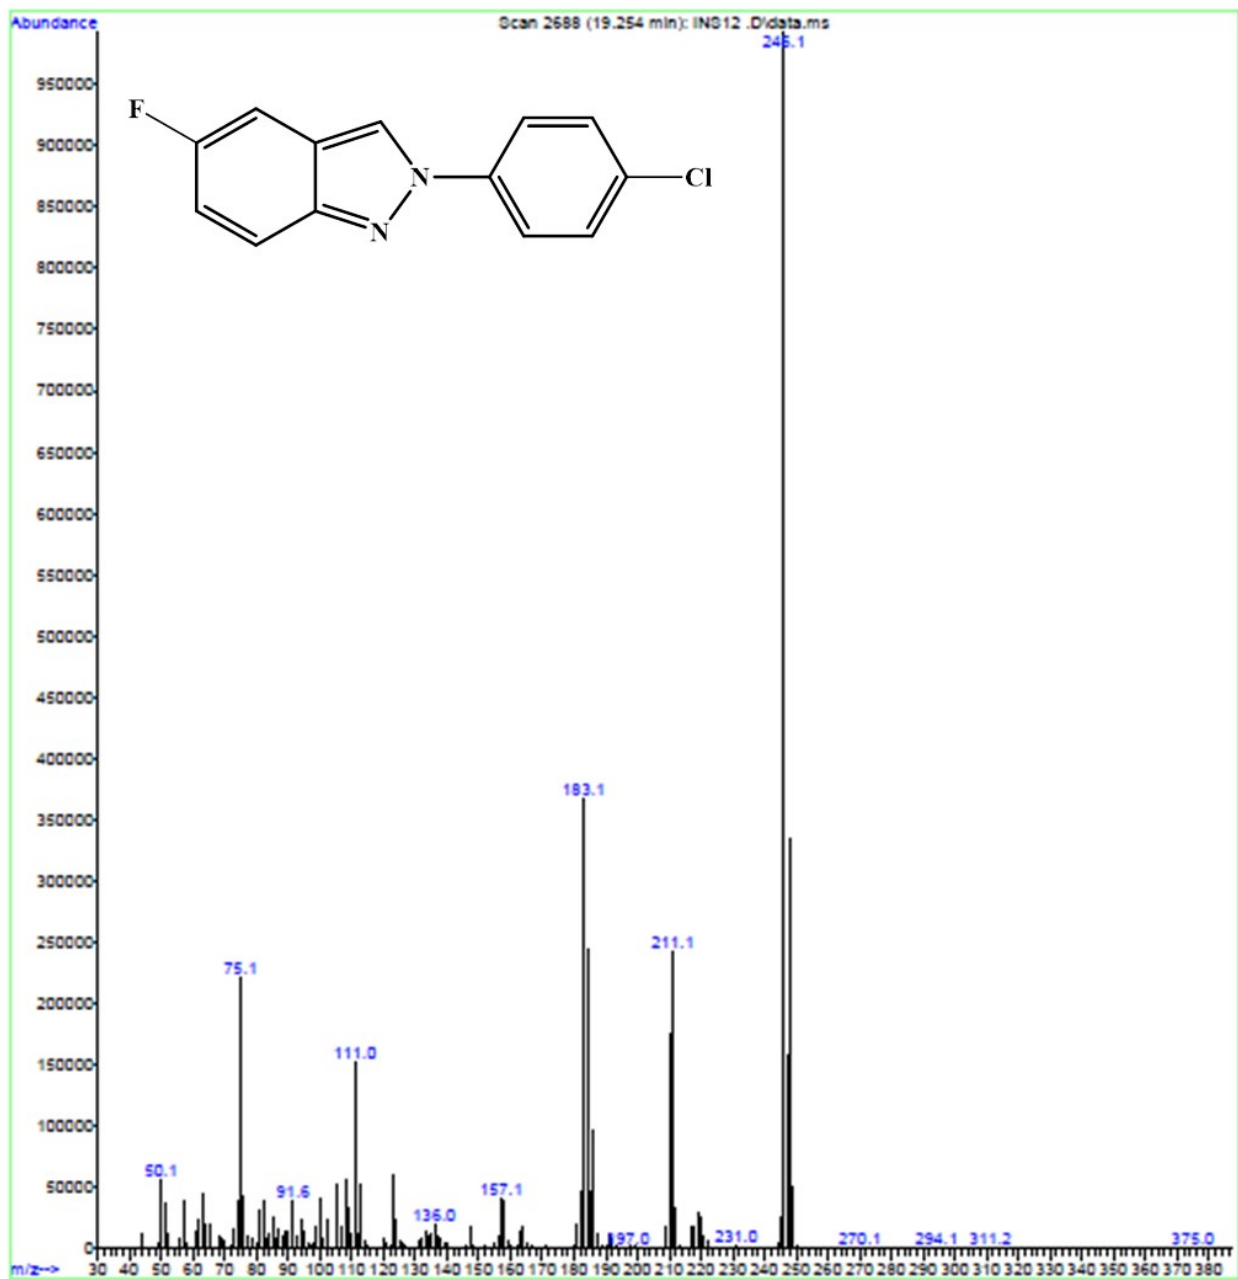



# NMR Spectra of the synthesized products

Entry 1 <sup>1</sup>H NMR spectrum of 2-phenyl-2H-indazole (CDCl<sub>3</sub>) Full

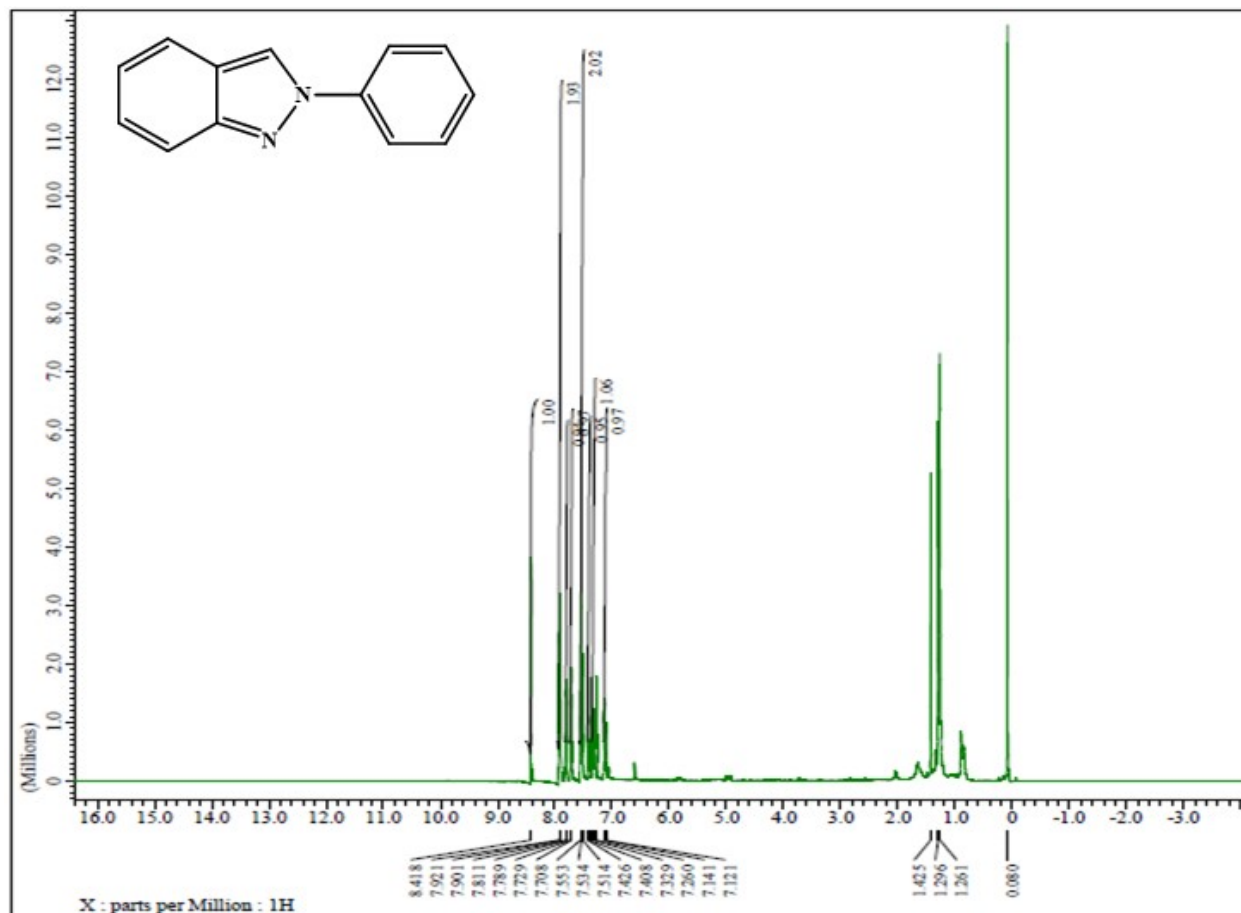

Entry 1 <sup>1</sup>H NMR spectrum of 2-phenyl-2H-indazole (CDCl<sub>3</sub>) Expansion

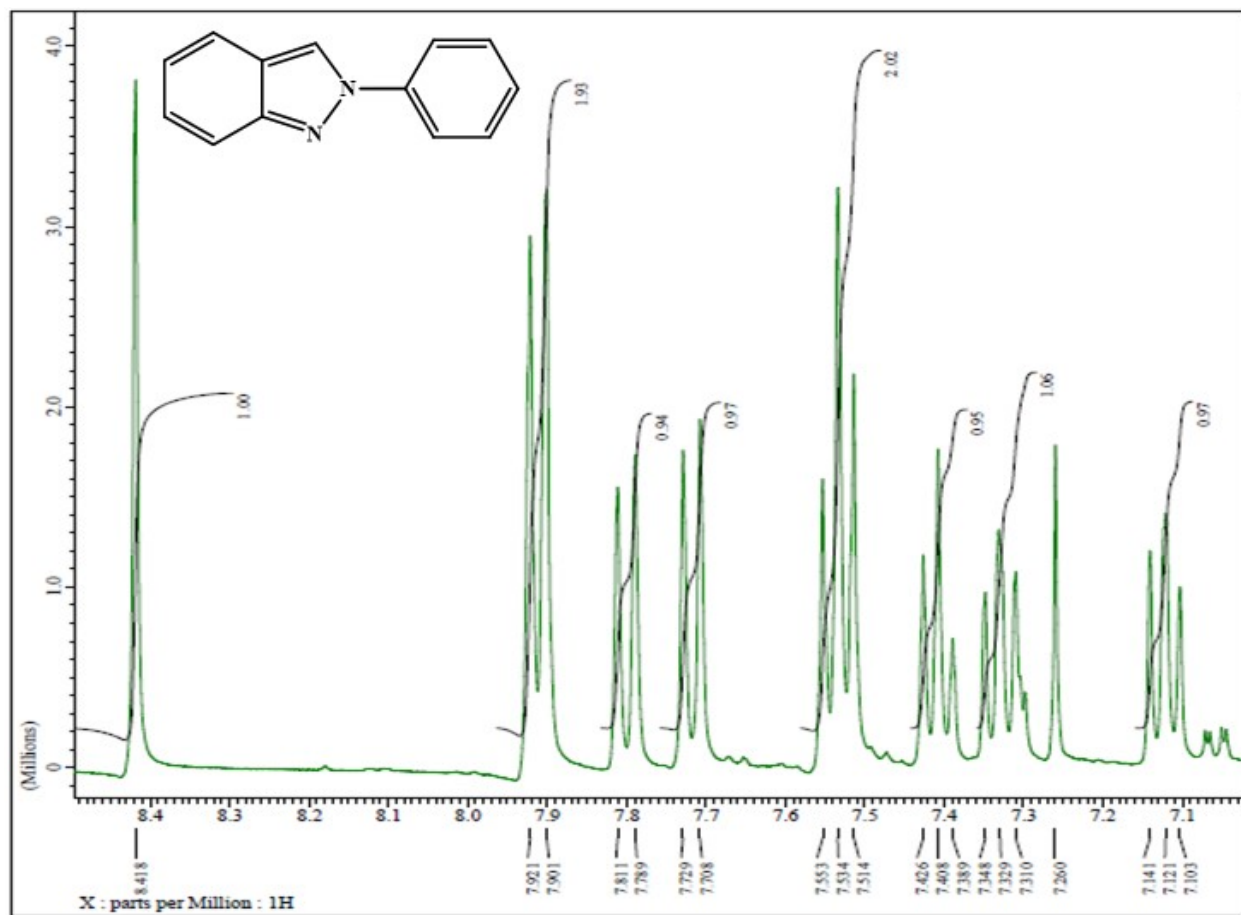

Entry 2 <sup>1</sup>H NMR spectrum of 2-(4-methoxyphenyl)-2H-indazole (CDCl<sub>3</sub>) Full

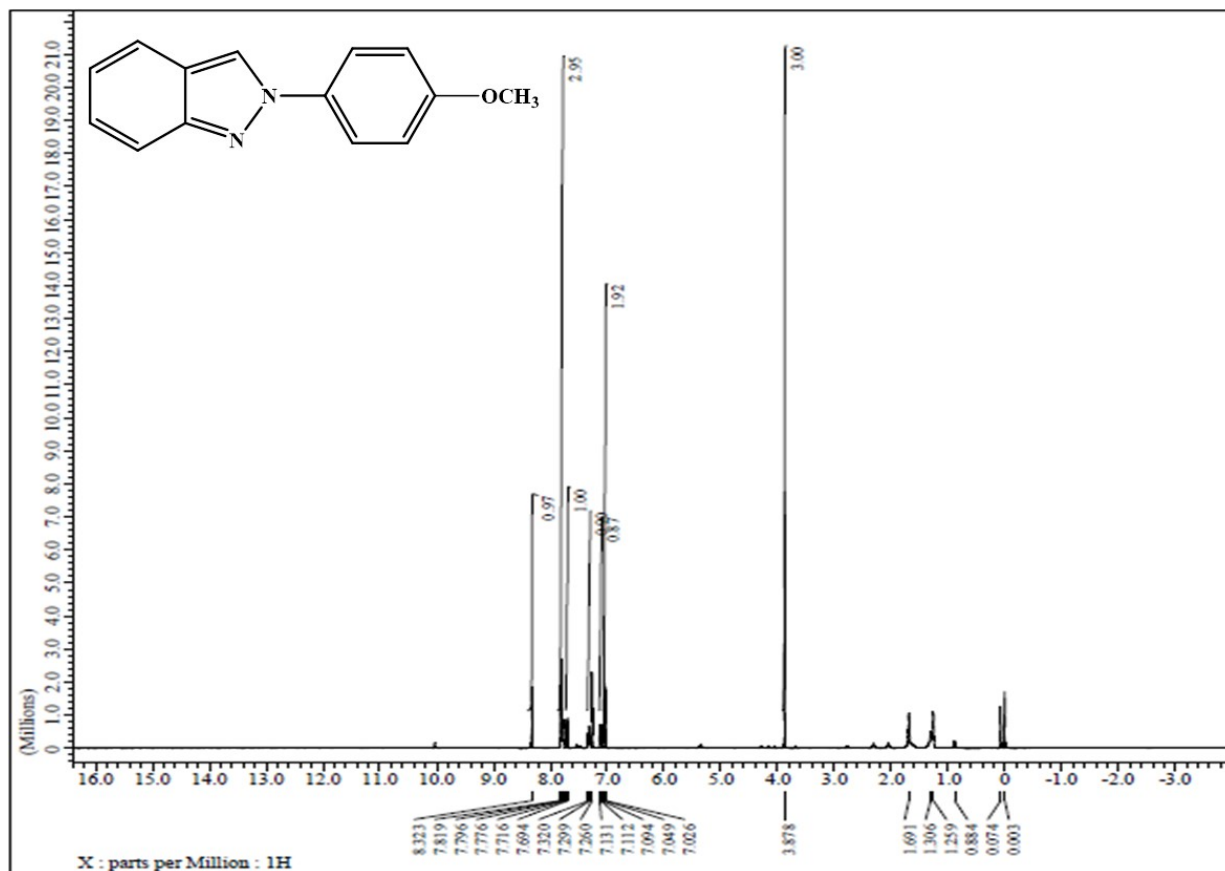

Entry 2 <sup>1</sup>H NMR spectrum of 2-(4-methoxyphenyl)-2H-indazole (CDCl<sub>3</sub>) Expansion

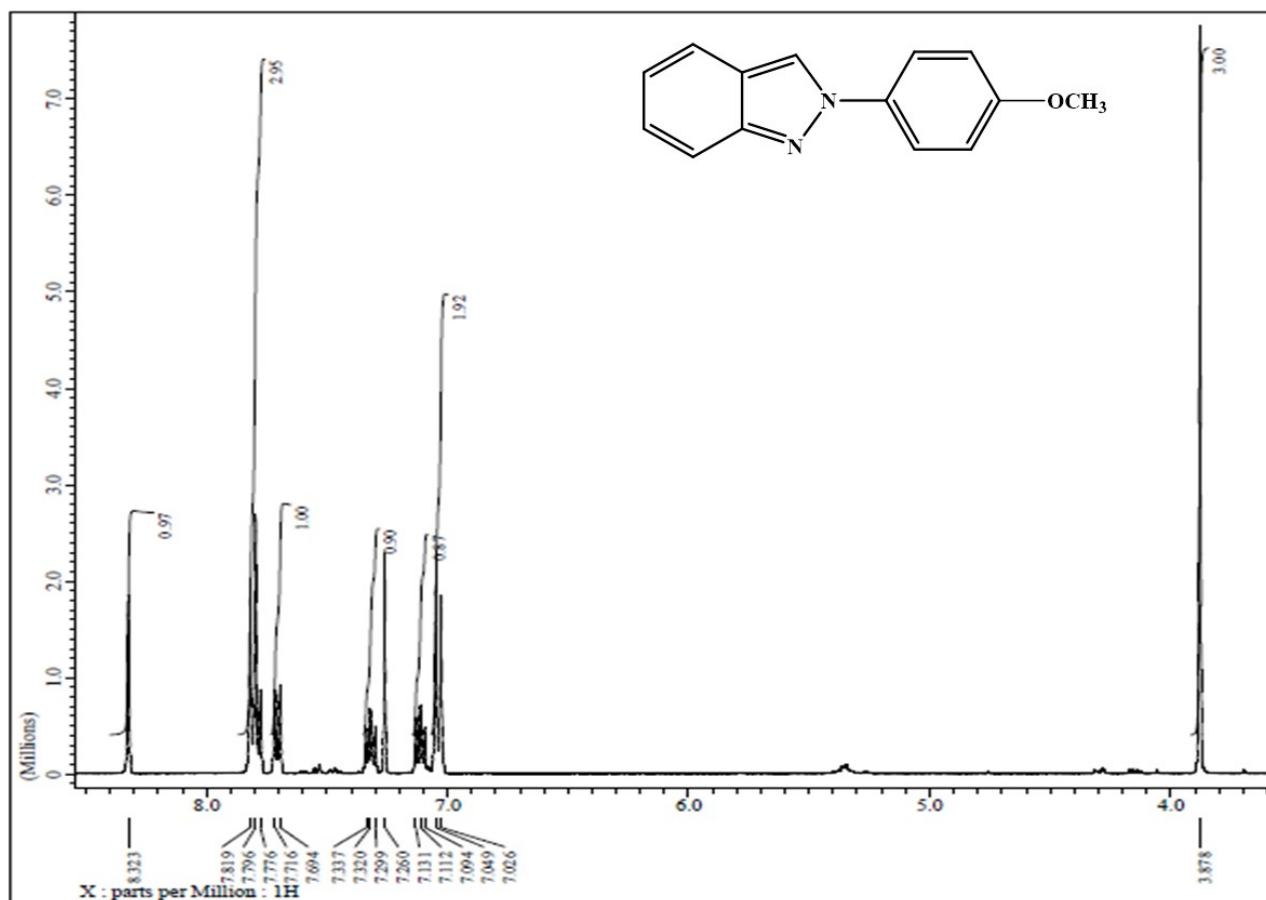

Entry 3 <sup>1</sup>H NMR spectrum of 2-(o-tolyl)-2H-indazole (CDCl<sub>3</sub>) Full

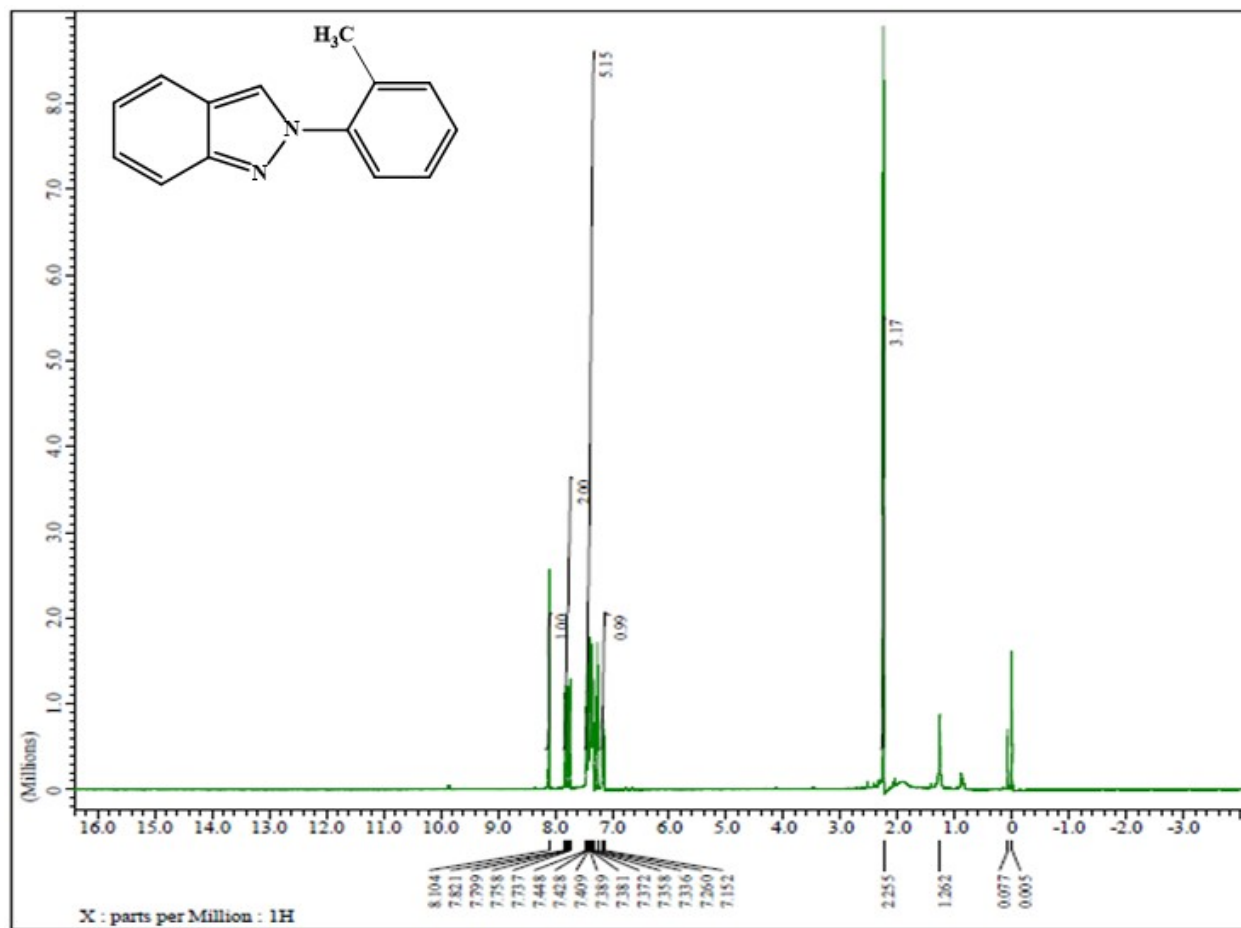

Entry 3 <sup>1</sup>H NMR spectrum of 2-(o-tolyl)-2H-indazole (CDCl<sub>3</sub>) Expansion

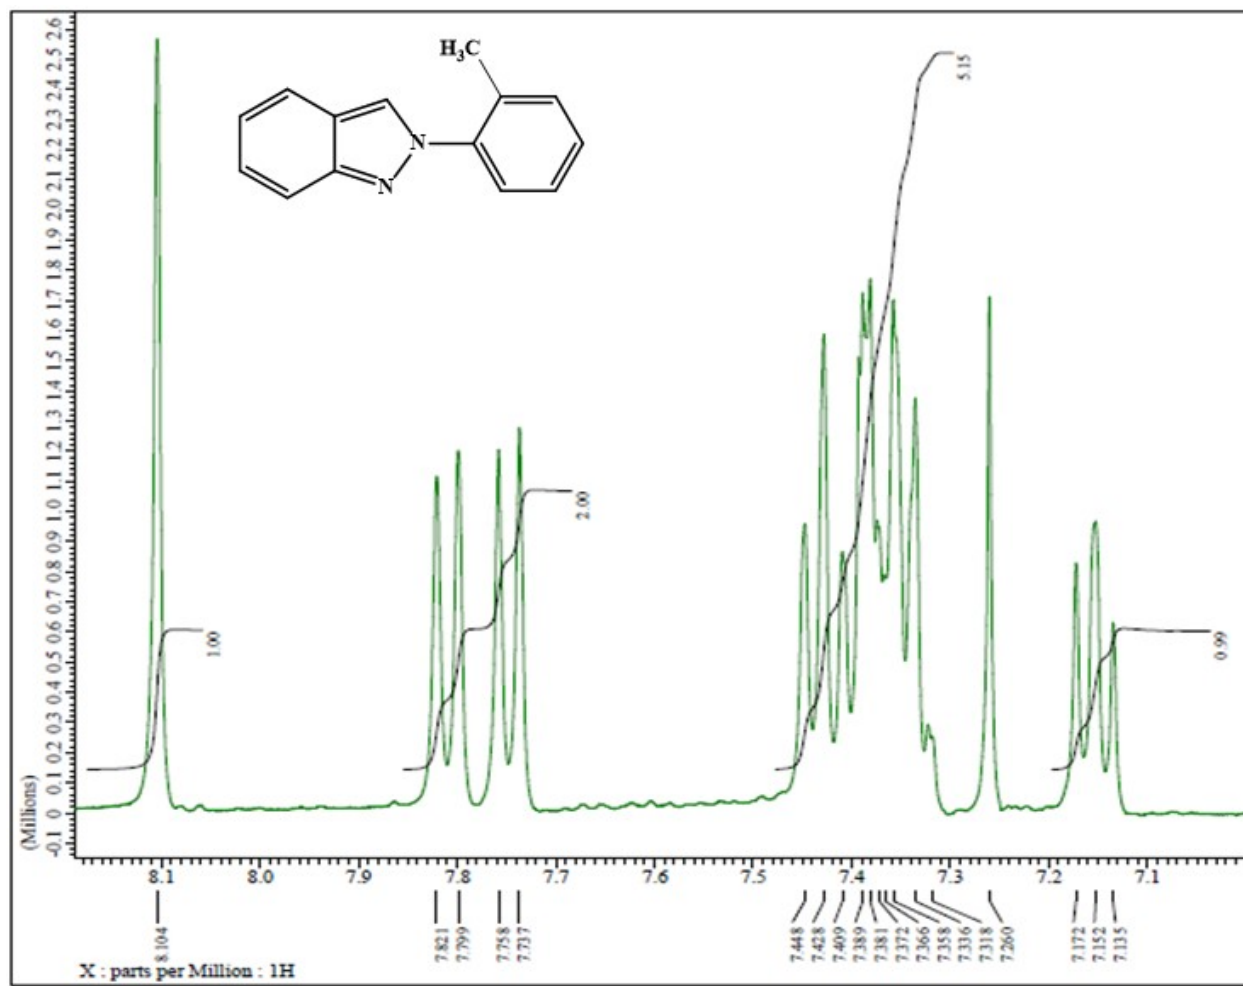

Entry 3  $^1\text{H}$  NMR spectrum of 2-(o-tolyl)-2H-indazole ( $\text{CDCl}_3$ ) Expansion

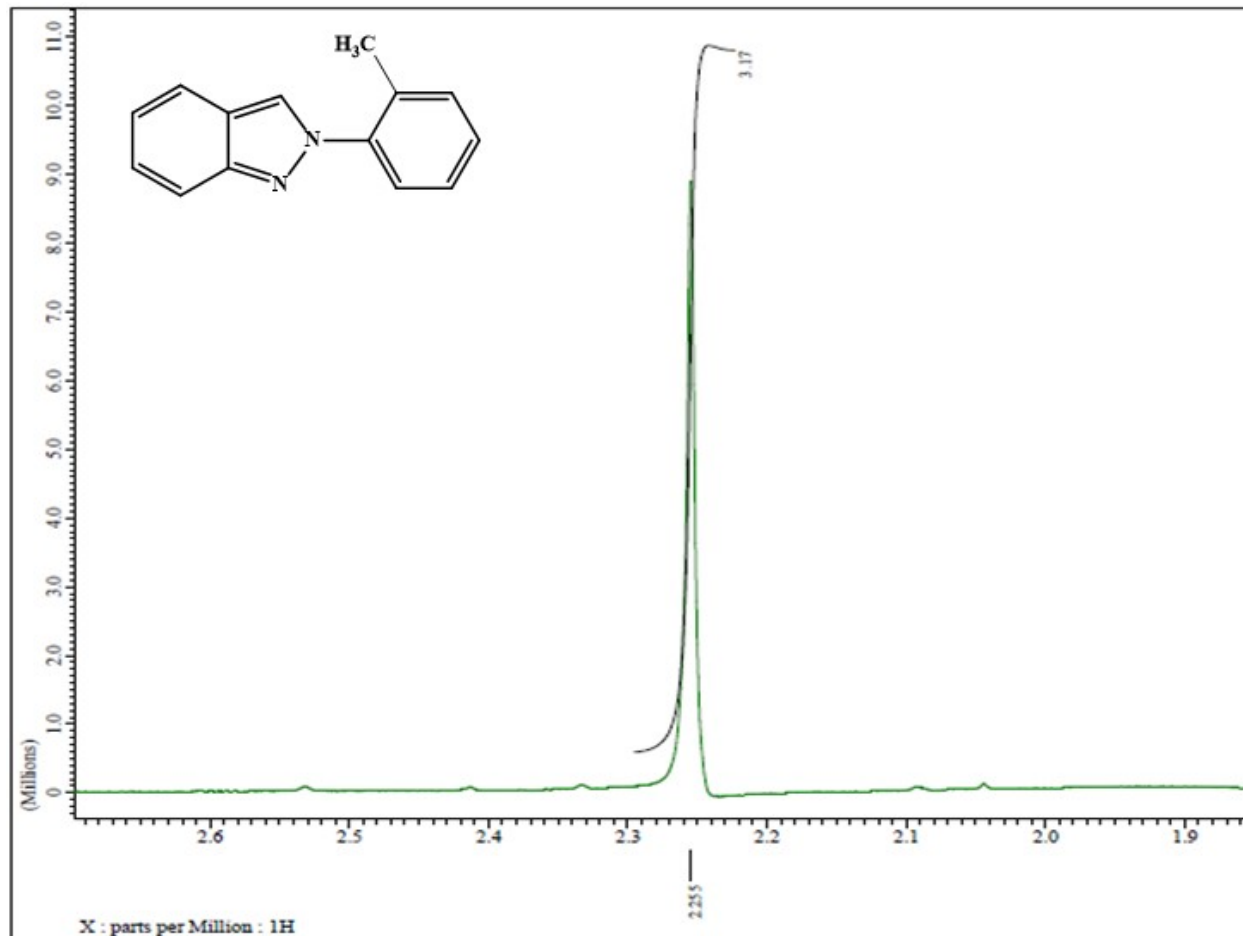

Entry 4 <sup>1</sup>H NMR spectrum of 2-(p-tolyl)-2H-indazole (CDCl<sub>3</sub>) Full

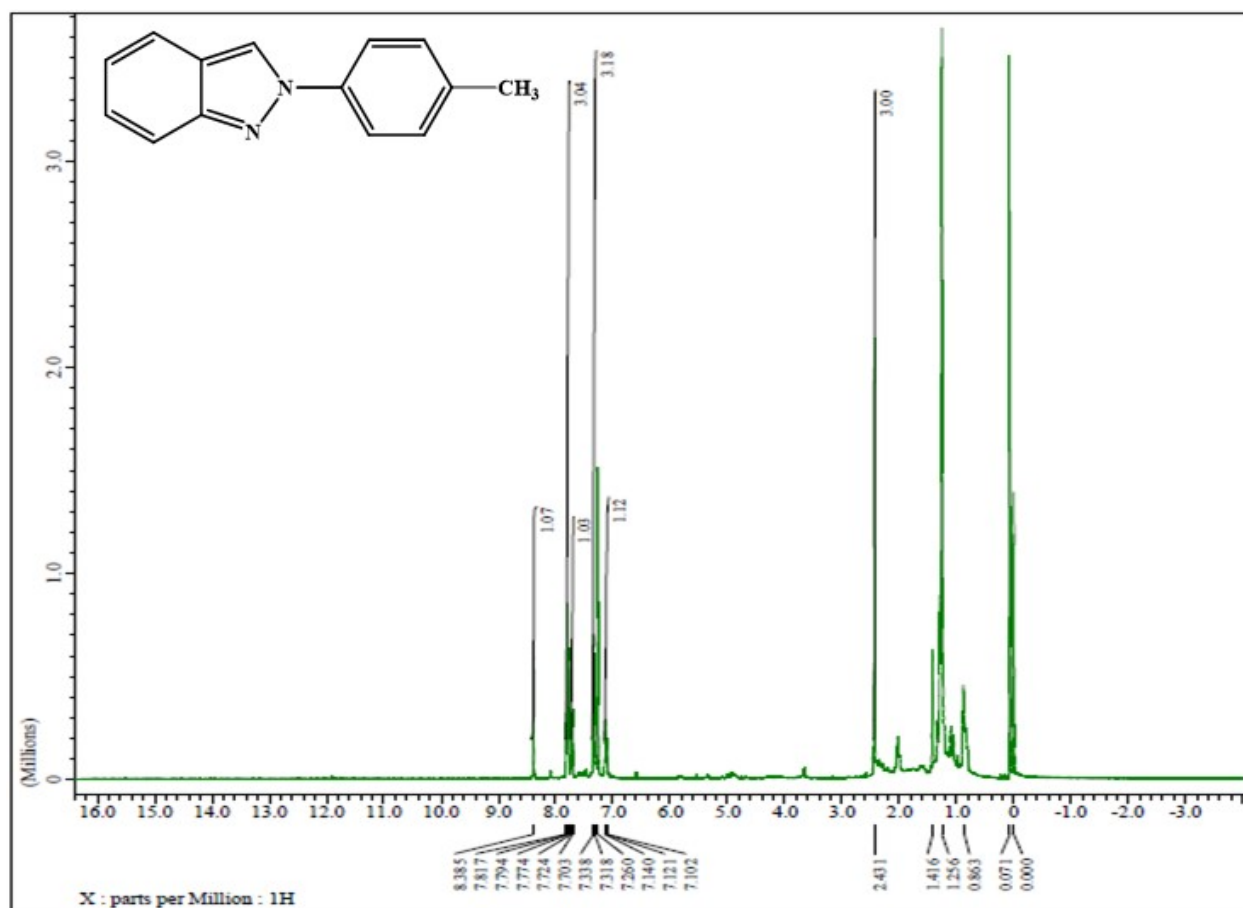



Entry 4  $^1\text{H}$  NMR spectrum of 2-(p-tolyl)-2H-indazole ( $\text{CDCl}_3$ ) Expansion

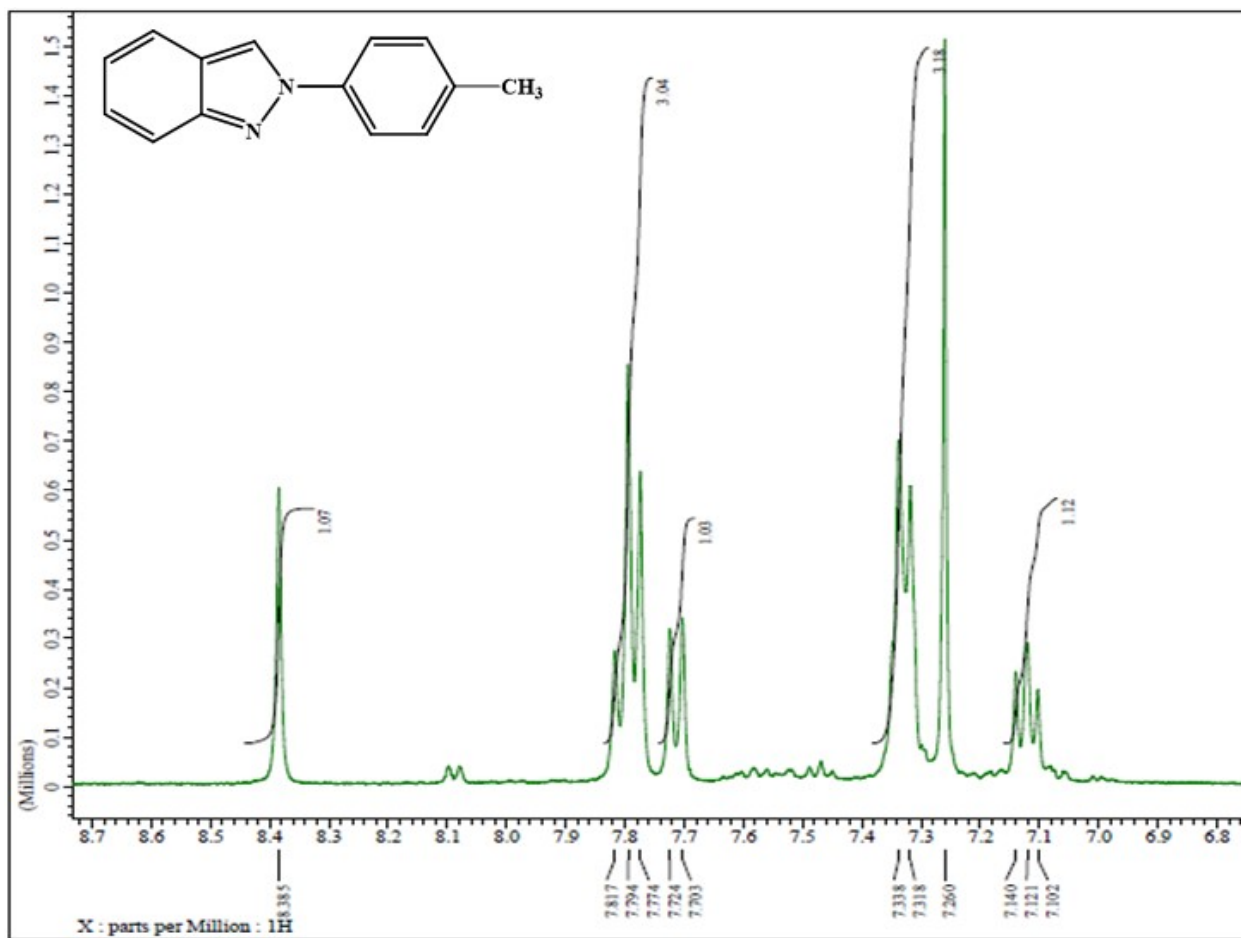

Entry 4 <sup>1</sup>H NMR spectrum of 2-(p-tolyl)-2H-indazole (CDCl<sub>3</sub>) Expansion

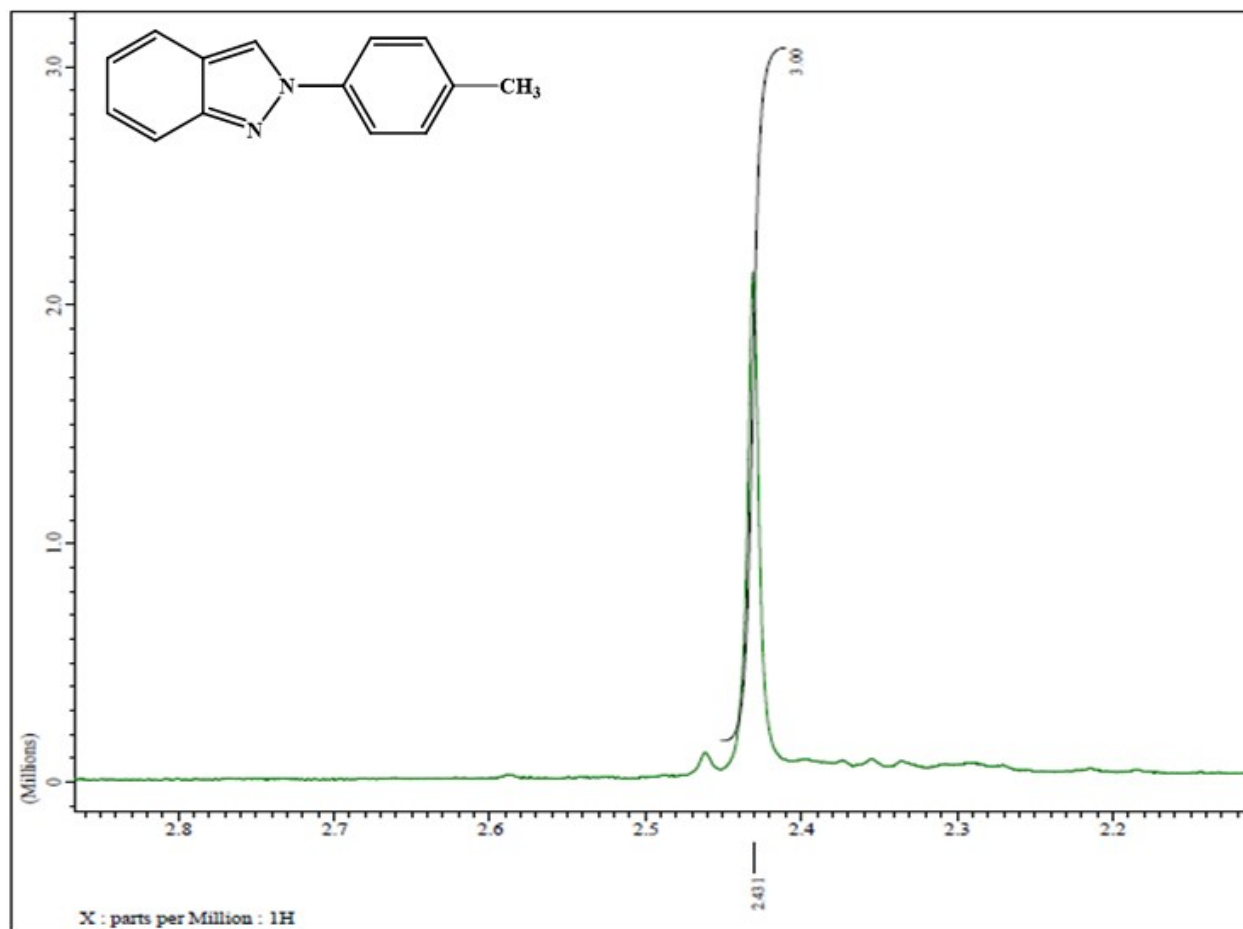

Entry 5 <sup>1</sup>H NMR spectrum of 2-(4-bromophenyl)-2H-indazole (CDCl<sub>3</sub>) Full

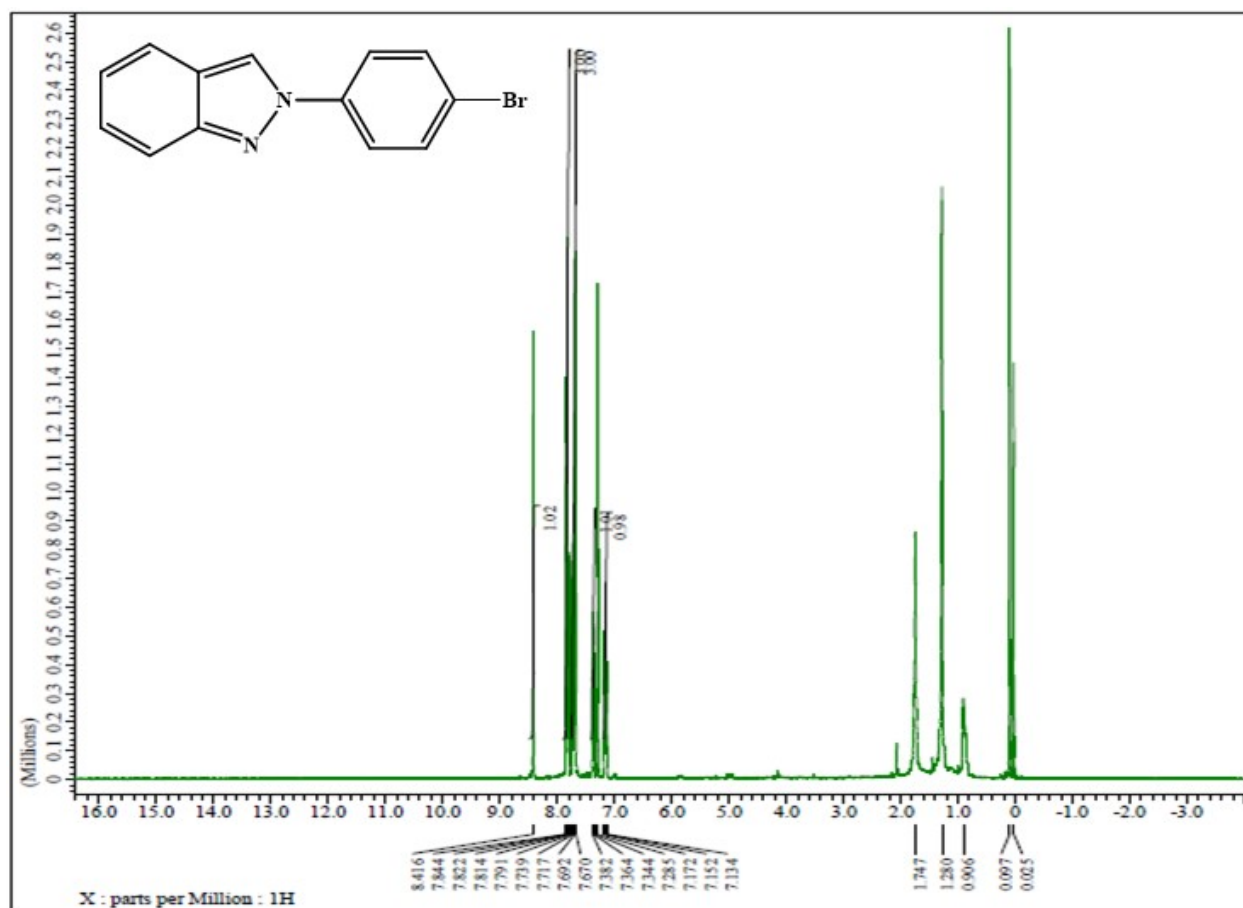

Entry 5 <sup>1</sup>H NMR spectrum of 2-(4-bromophenyl)-2H-indazole (CDCl<sub>3</sub>) Expansion

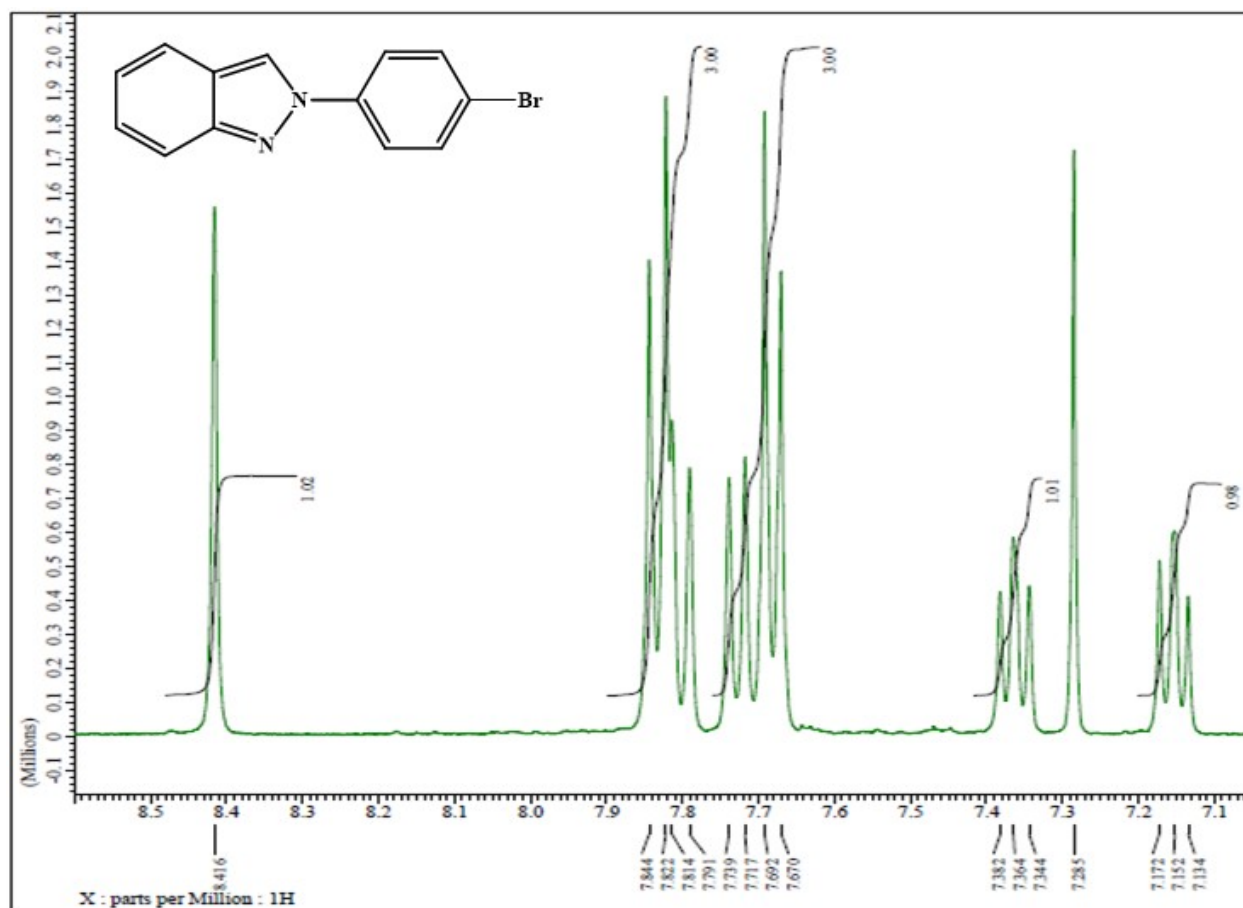

Entry 6 <sup>1</sup>H NMR spectrum of 2-(4-chlorophenyl)-2H-indazole (CDCl<sub>3</sub>) Full

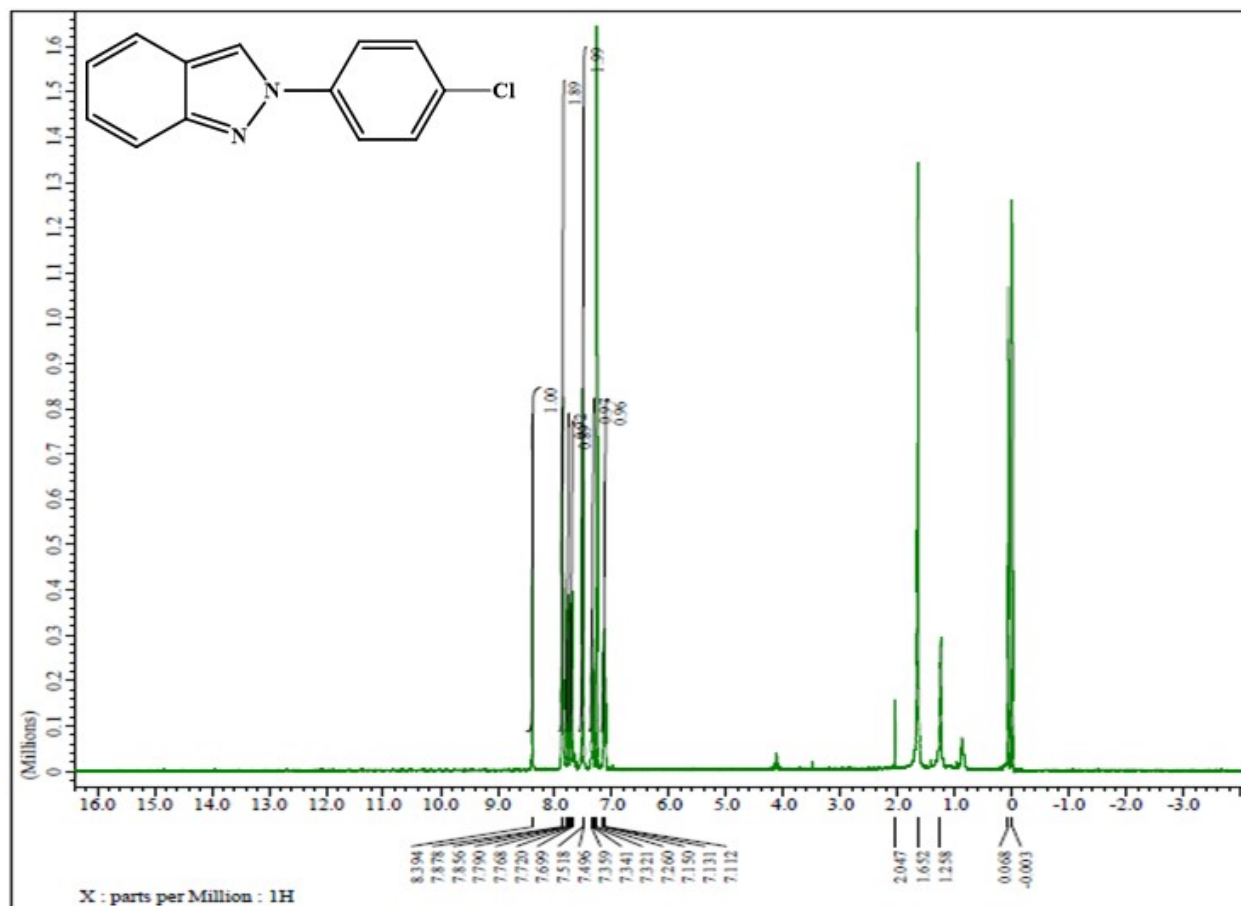

Entry 6  $^1\text{H}$  NMR spectrum of 2-(4-chlorophenyl)-2H-indazole ( $\text{CDCl}_3$ ) Expansion

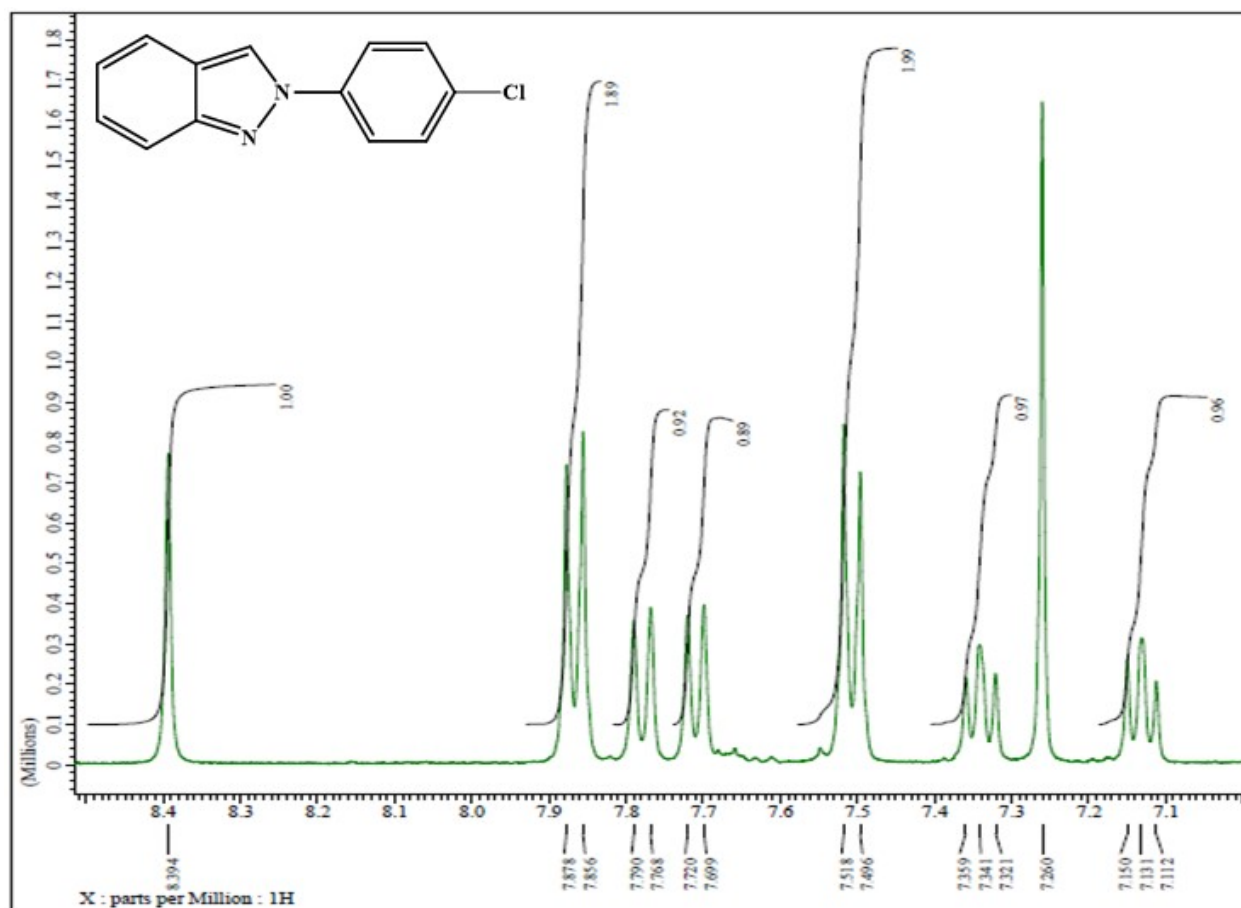

Entry 7 <sup>1</sup>H NMR spectrum of 5-fluoro-2-phenyl-2H-indazole (CDCl<sub>3</sub>) Full

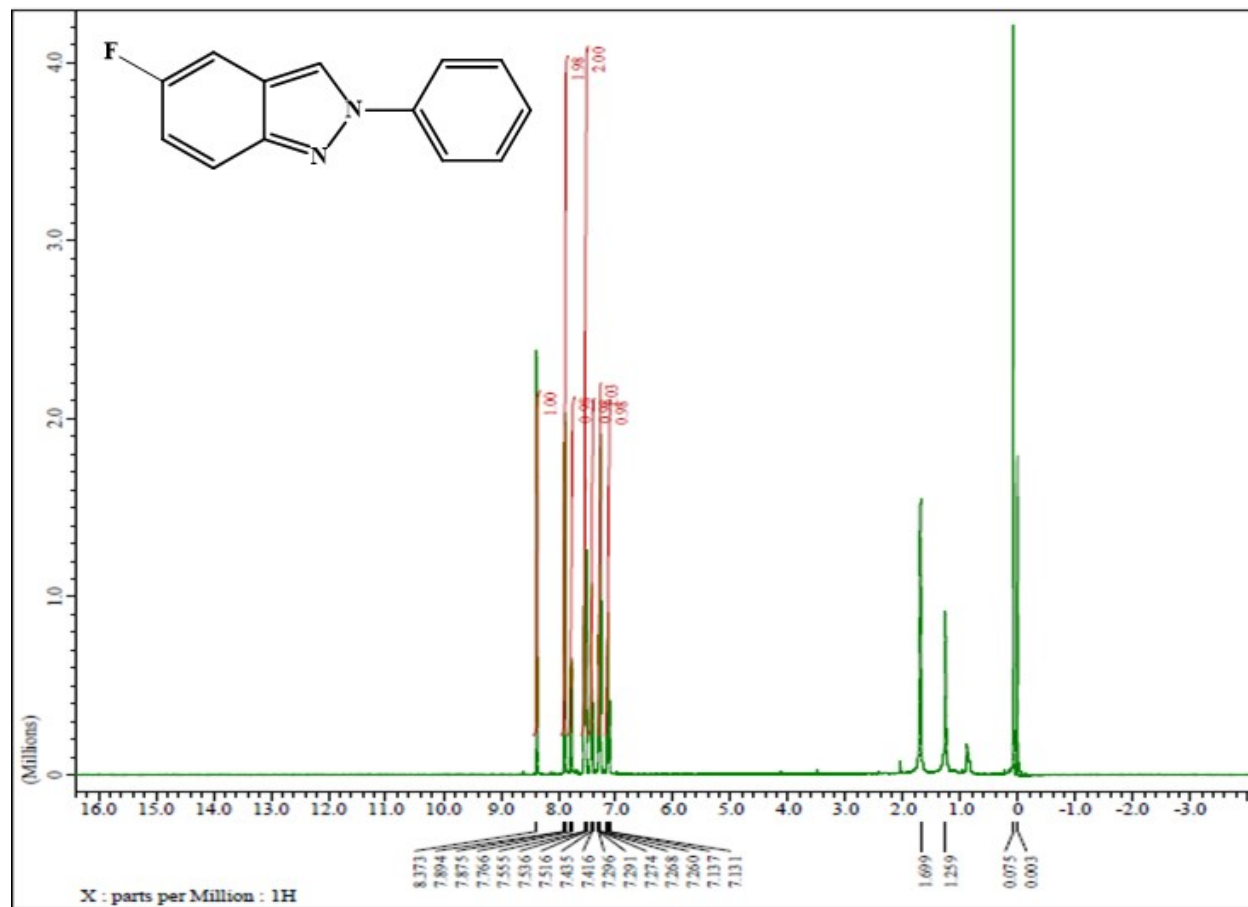

Entry 7 <sup>1</sup>H NMR spectrum of 5-fluoro-2-phenyl-2H-indazole (CDCl<sub>3</sub>) Expansion

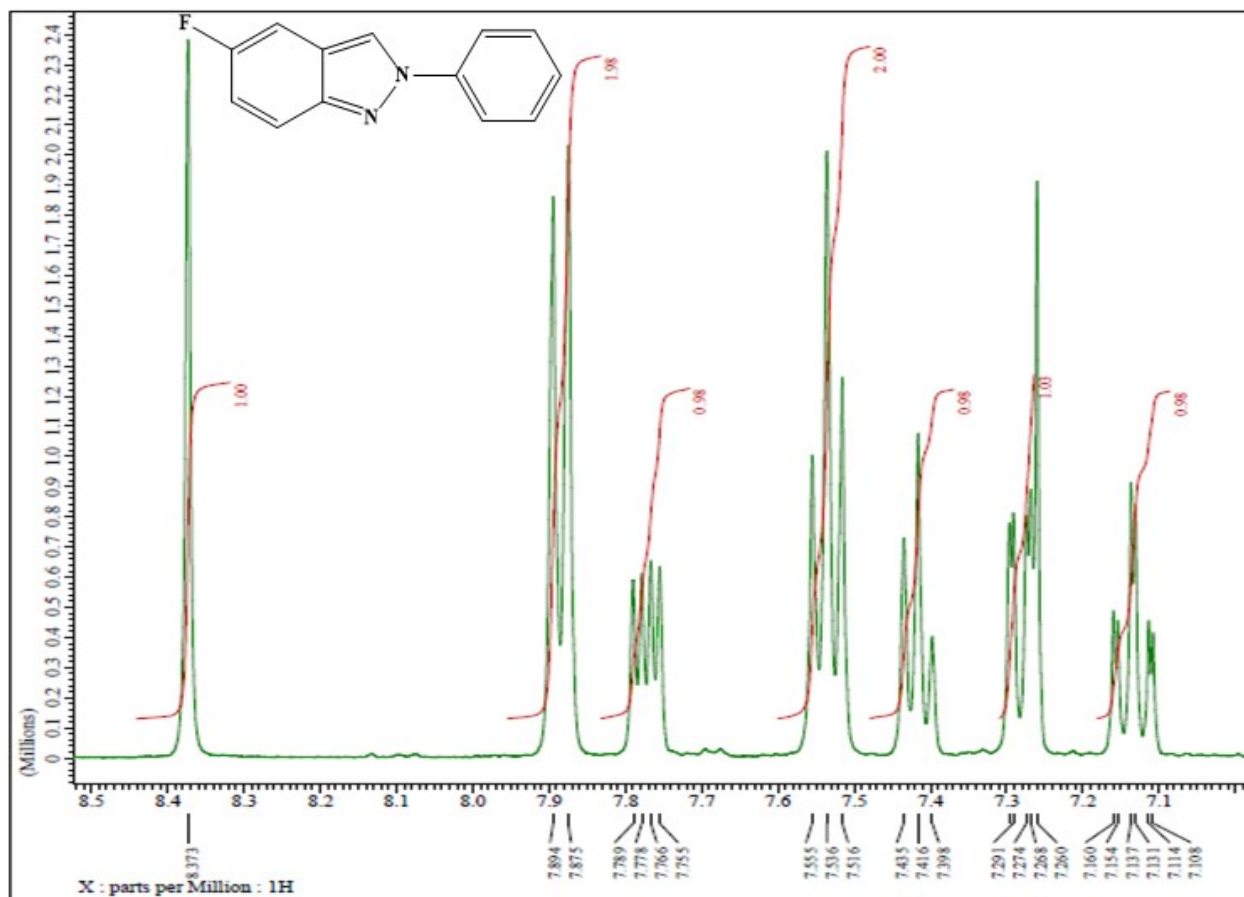



Entry 8 <sup>1</sup>H NMR spectrum of 5-fluoro-2-(4-methoxyphenyl)-2H-indazole (CDCl<sub>3</sub>) Full

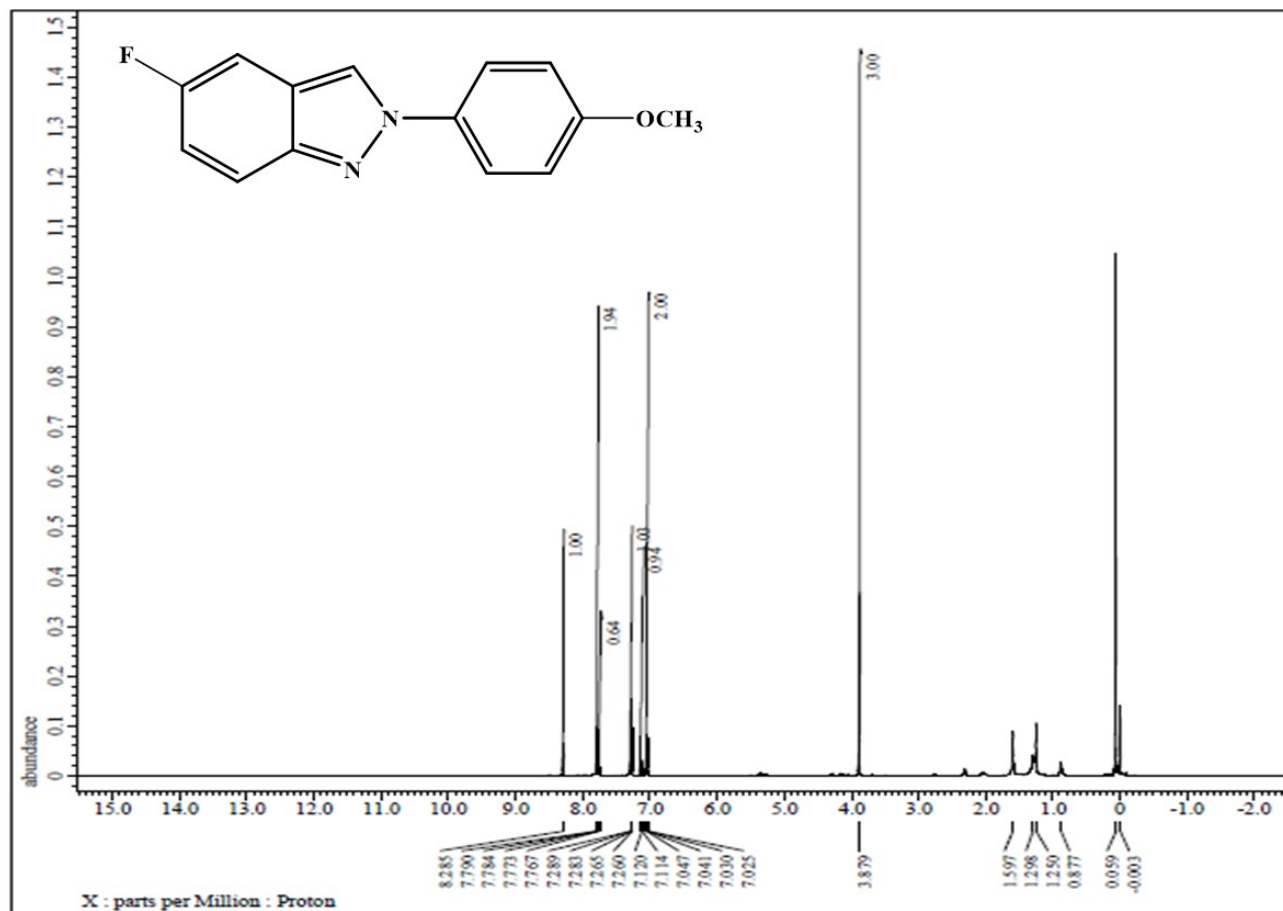

Entry 8  $^1\text{H}$  NMR spectrum of 5-fluoro-2-(4-methoxyphenyl)-2H-indazole ( $\text{CDCl}_3$ )

Expansion

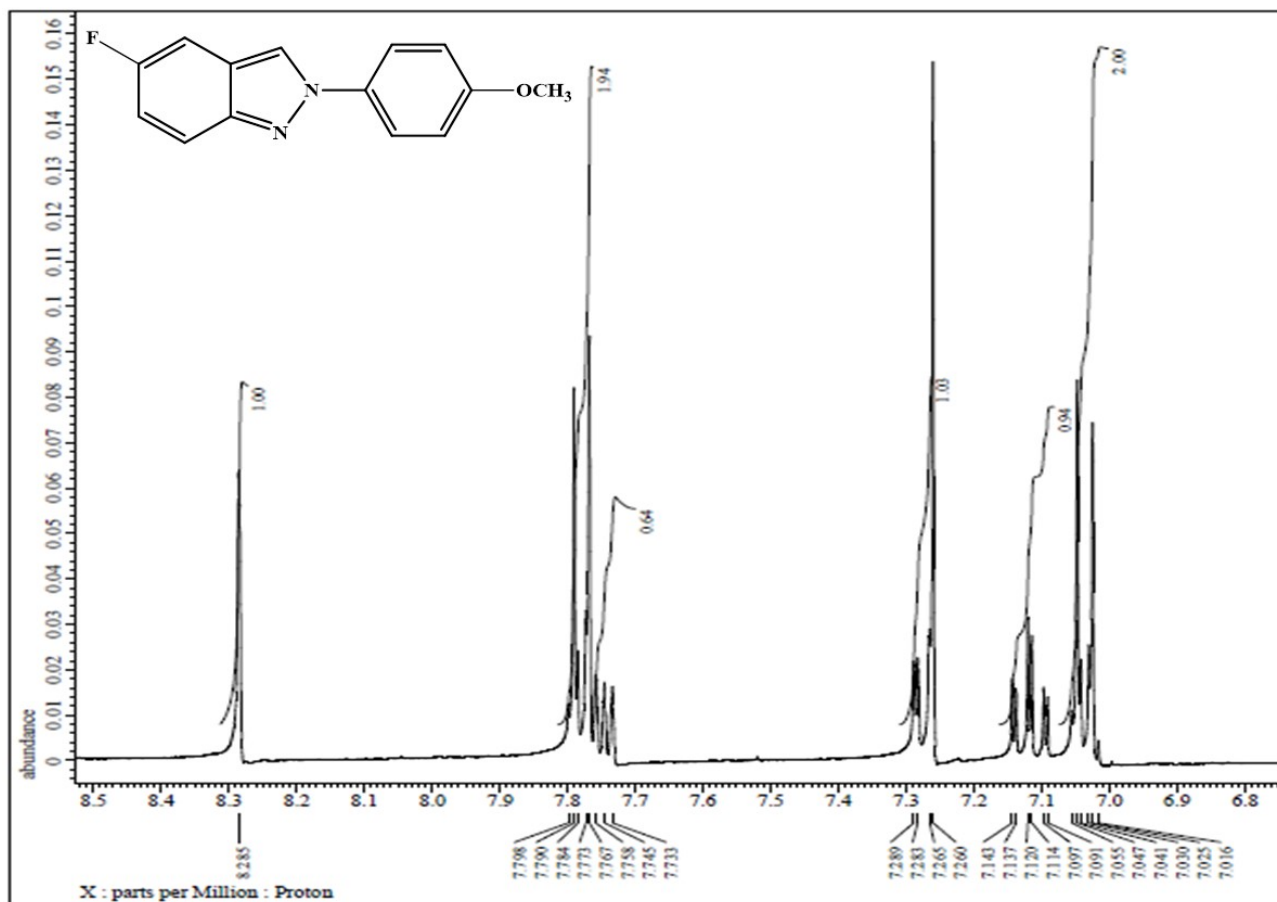

Entry 9 <sup>1</sup>H NMR spectrum of 5-fluoro-2-(p-tolyl)-2H-indazole (CDCl<sub>3</sub>) Full

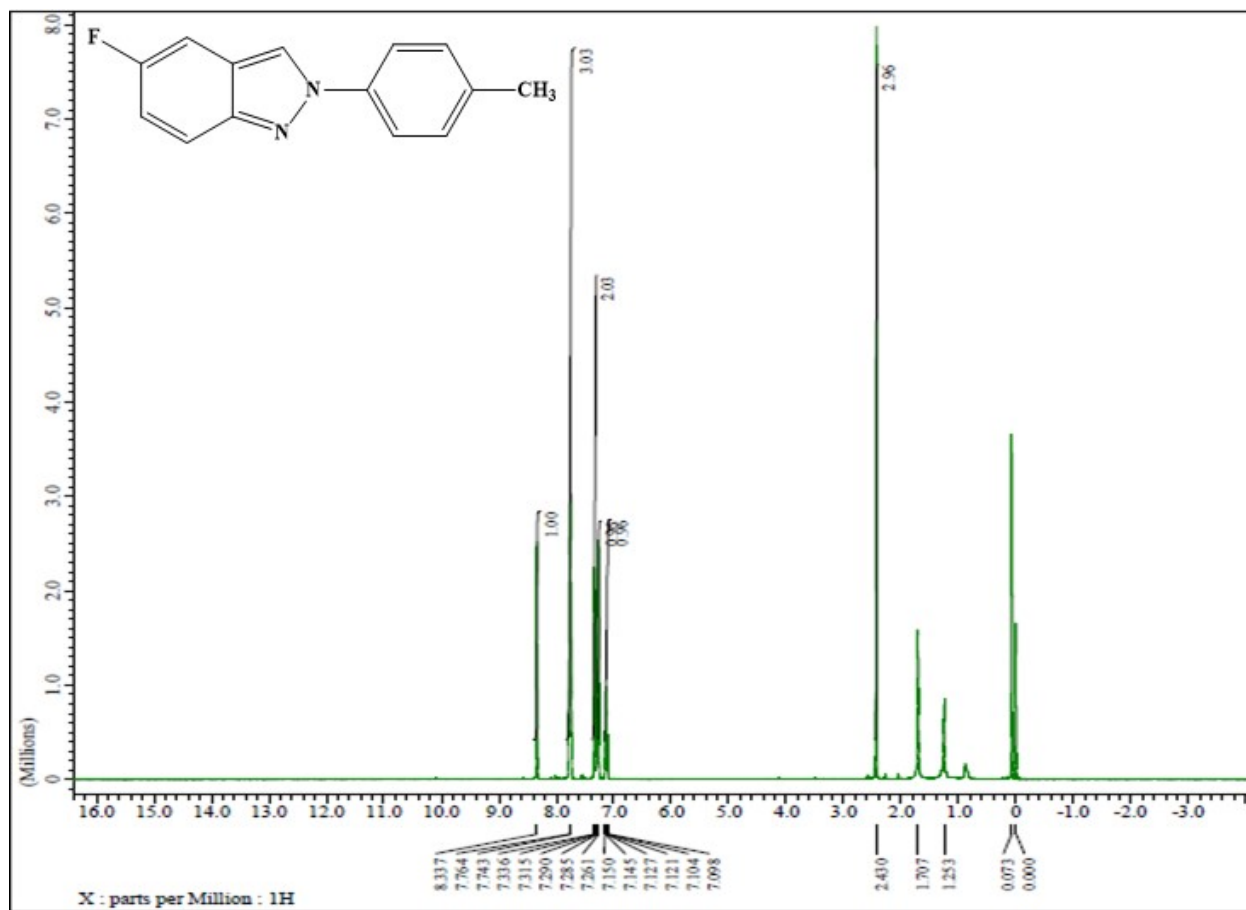

Entry 9 <sup>1</sup>H NMR spectrum of 5-fluoro-2-(p-tolyl)-2H-indazole (CDCl<sub>3</sub>) Expansion

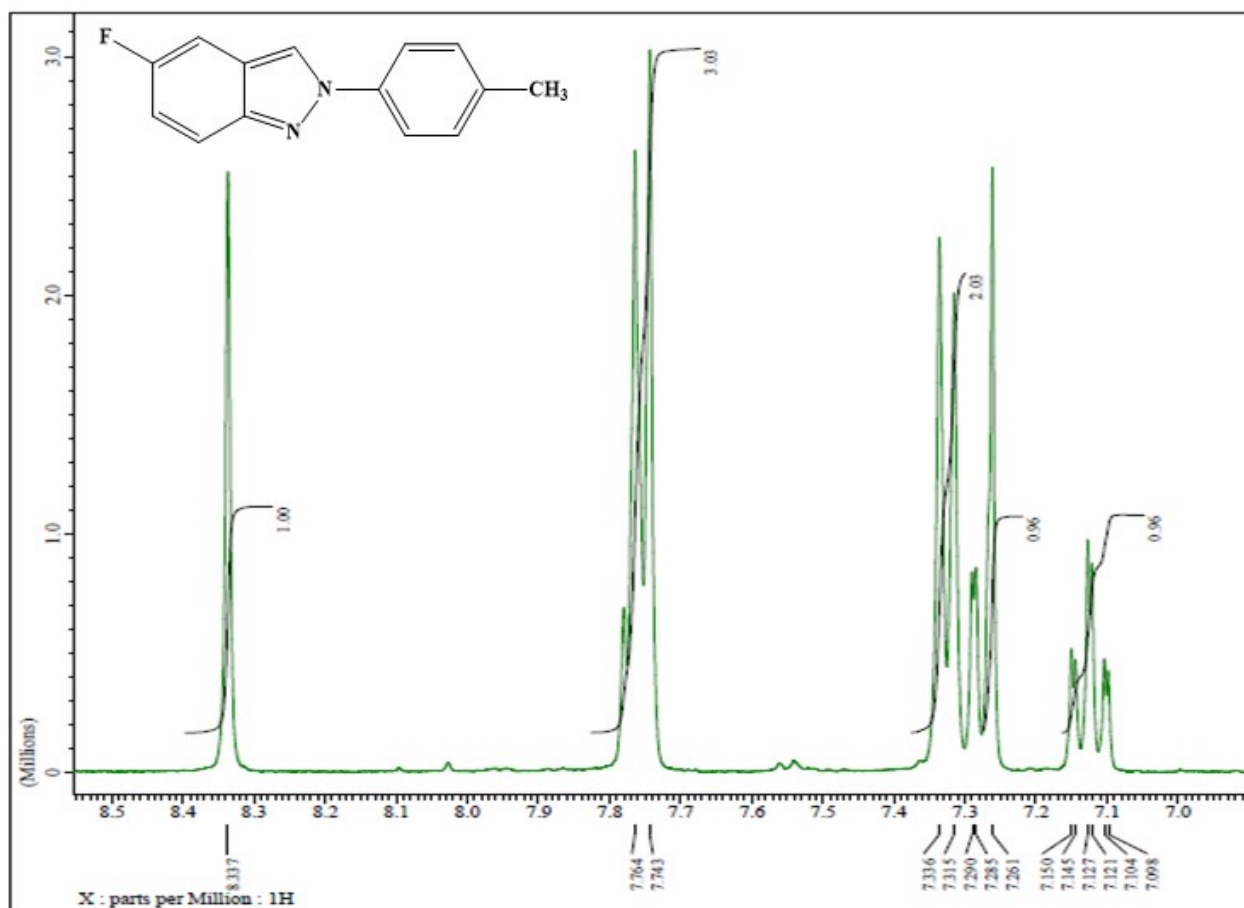

Entry 9  $^1\text{H}$  NMR spectrum of 5-fluoro-2-(p-tolyl)-2H-indazole ( $\text{CDCl}_3$ ) Expansion

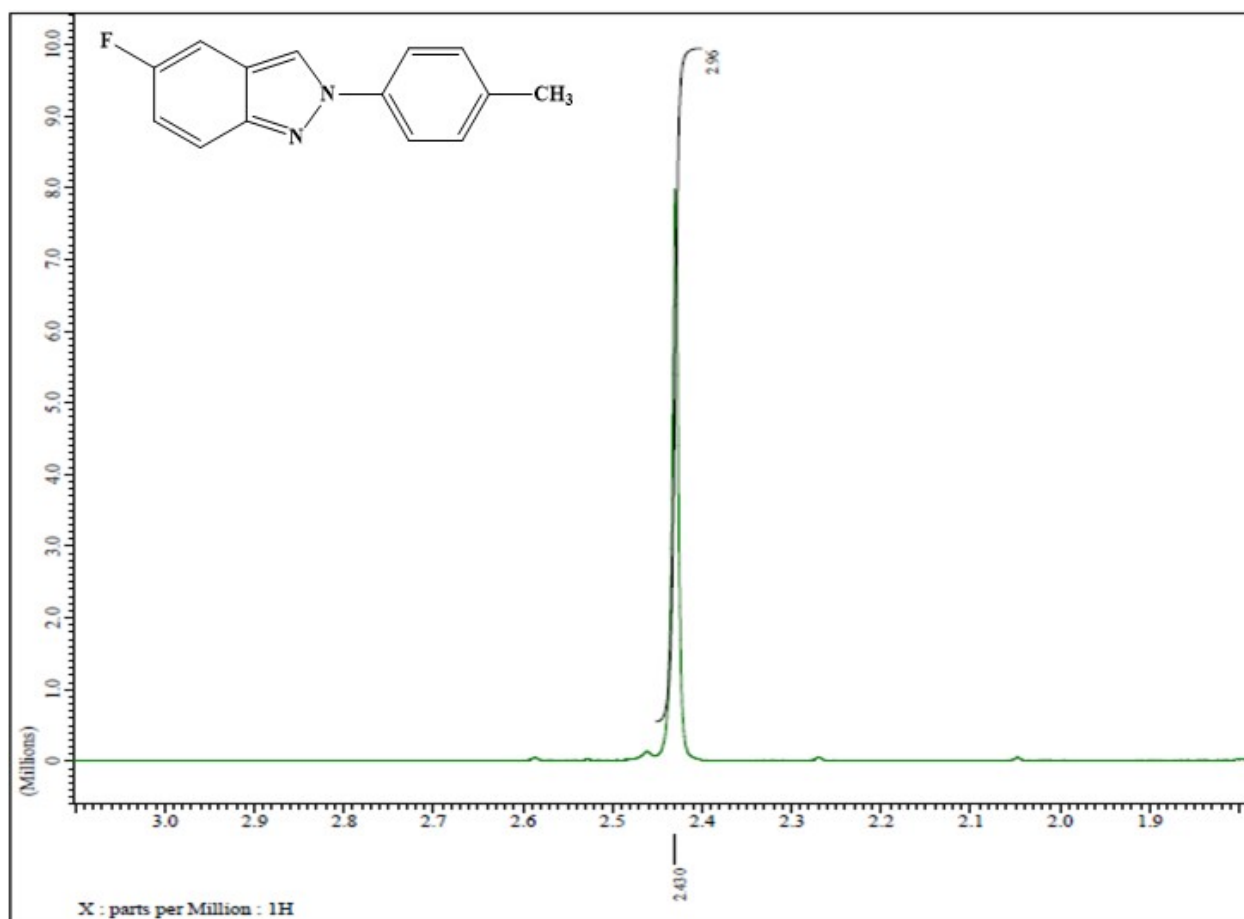

Entry 10 <sup>1</sup>H NMR spectrum of 2-(4-bromophenyl)-5-fluoro-2H-indazole (CDCl<sub>3</sub>) Full

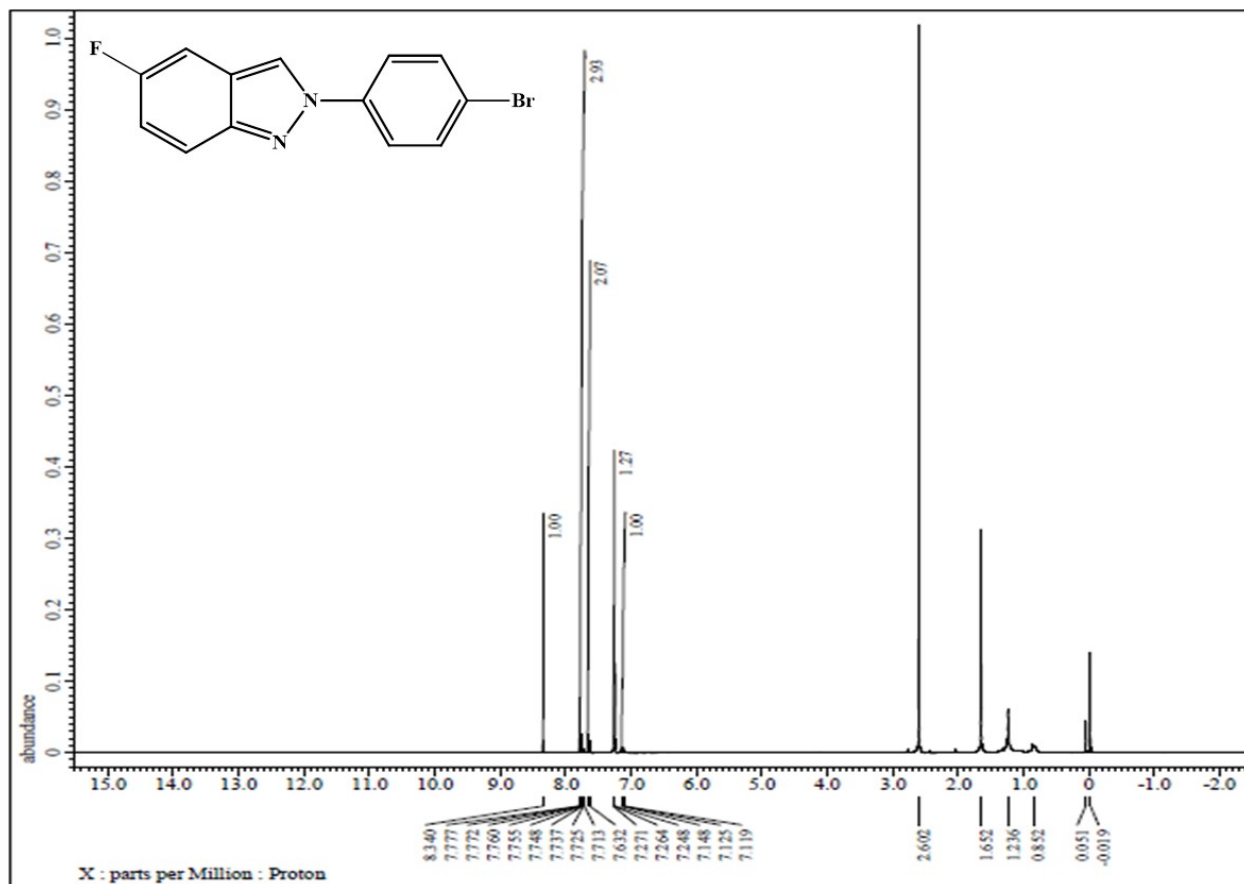

Entry 10  $^1\text{H}$  NMR spectrum of 2-(4-bromophenyl)-5-fluoro-2H-indazole ( $\text{CDCl}_3$ )

Expansion

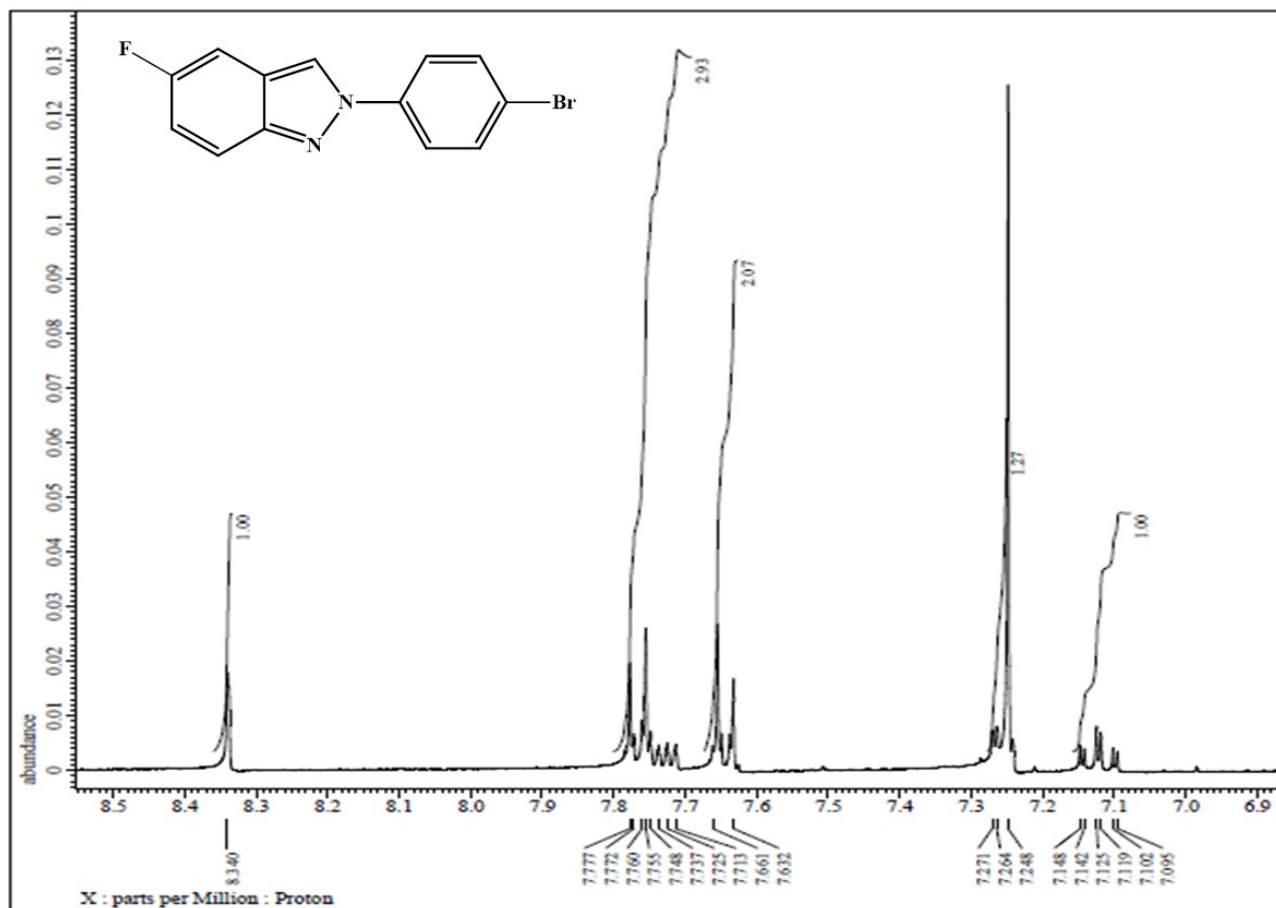

Entry 11 <sup>1</sup>H NMR spectrum of 2-(4-chlorophenyl)-5-fluoro-2H-indazole (CDCl<sub>3</sub>) Full

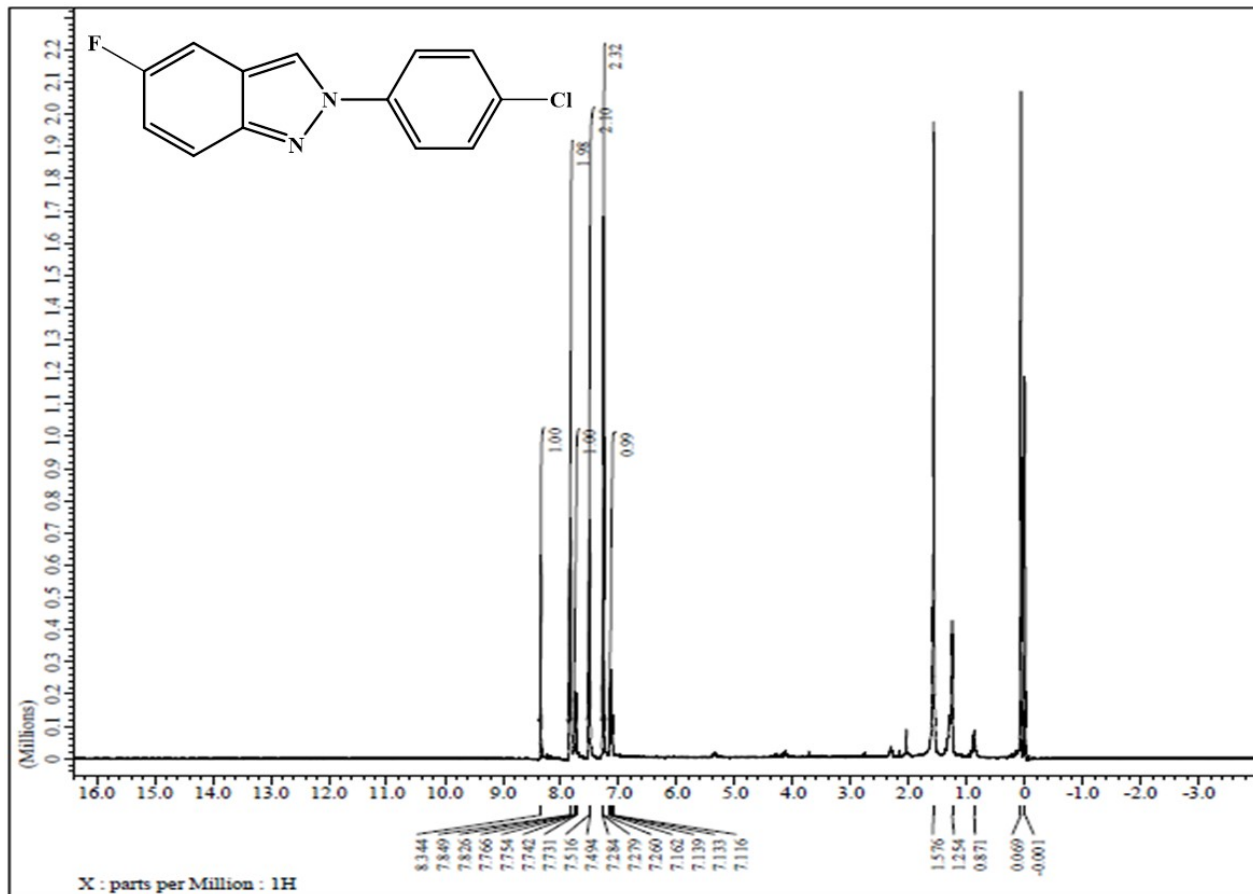



Entry 11 <sup>1</sup>H NMR spectrum of 2-(4-chlorophenyl)-5-fluoro-2H-indazole (CDCl<sub>3</sub>) Expansion

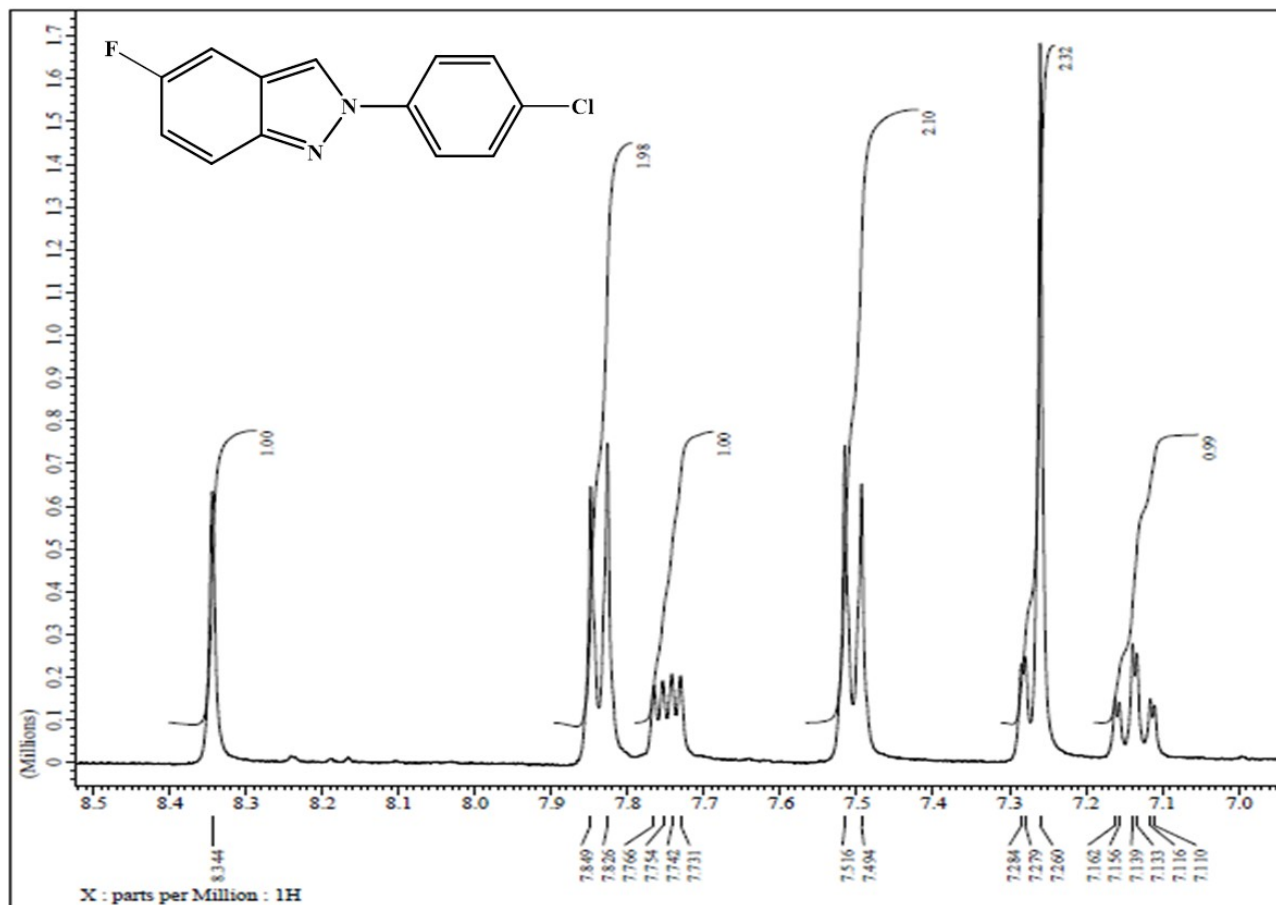

Supplement: d2nj01490d1.pdf [file d2nj01490d1.pdf]
